# Supplementary material for: Three-metal-center spin interactions through the intercalation of metal azaporphines and porphines into an organic pillared coordination box
Source: Royal Society of Chemistry journal article supplement (doi:10.1039/b801701h), 2008-01-01
Supplement: b801701h.pdf [file b801701h.pdf]

## SUPPORTING INFORMATION

### Three-Metal-Center Spin Interactions through the Intercalation of Metal Azaporphines and Porphines into an Organic Pillared Coordination Box

*Kosuke Ono, Michito Yoshizawa, Tatsuhisa Kato, and Makoto Fujita*

#### Contents

- Materials and instrumentations.
- Synthesis and physical data of **1D(6a)<sub>3</sub>**: <sup>1</sup>H-NMR, <sup>13</sup>C-NMR, HSQC, HMBC, NOESY, DOSY, UV-vis, and CSI-MS spectra.
- Physical data of **1D(6b)<sub>3</sub>**: CSI-MS and UV-vis spectra.
- UV-vis spectrum of **6b**
- Synthesis and physical data of **1D(5a•6a•5a)**: <sup>1</sup>H-NMR, <sup>13</sup>C-NMR, HSQC, HMBC, NOESY, DOSY, UV-vis, and CSI-MS spectra.
- Physical data of **1D(5b•6c•5b)**: CSI-MS and UV-vis spectra.
- Physical data of **1D(5b•6d•5b)**: CSI-MS and UV-vis spectra.
- Physical data of **1D(5b•6a•5b)**: CSI-MS and UV-vis spectra.
- Physical data of **1D(5a•6d•5a)**: CSI-MS and UV-vis spectra.
- ESR spectra of **1D(6b)<sub>3</sub>**, **1D(5b•6c•5b)**, **1D(5b•6d•5b)**, **1D(5b•6a•5b)**, and **1D(5a•6d•5a)**.
- X-ray crystal data and structure of **1D(6a)<sub>3</sub>**.

### ■ Materials and instrumentations.

NMR spectra were recorded on a Bruker DRX-500 (500 MHz) spectrometer. TMS (CDCl<sub>3</sub> solution) in a capillary served as external standard ( $\delta$  0 ppm). CSI-MS (cold-spray ionization mass spectroscopy) data were measured on a four-sector (BE/BE) tandem mass spectrometer (JMS-700C, JEOL) equipped with the CSI source. IR measurements (ATR) were carried out using a DIGILAB Scimitar FTS-2000 instrument. UV-visible and ESR spectral data were recorded on a SHIMADZU UV-3150 and JEOL JMS-RE1X, respectively. Melting points were determined on a Yanaco MF-500 V micro melting point apparatus. Solvents and reagents were purchased from TCI Co., Ltd., WAKO Pure Chemical Industries Ltd., and Sigma-Aldrich Co. Deuteration H<sub>2</sub>O was acquired from Cambridge Isotope Laboratories, Inc. and used as supplied for the complexation reactions and NMR measurements. Tetrazaporphine (**6a**) was prepared from maleinitrile (ref. *J. Chem. Soc.*, **1952**, 4839–4846).

### ■ Synthesis of 1D(**6a**)<sub>3</sub>.

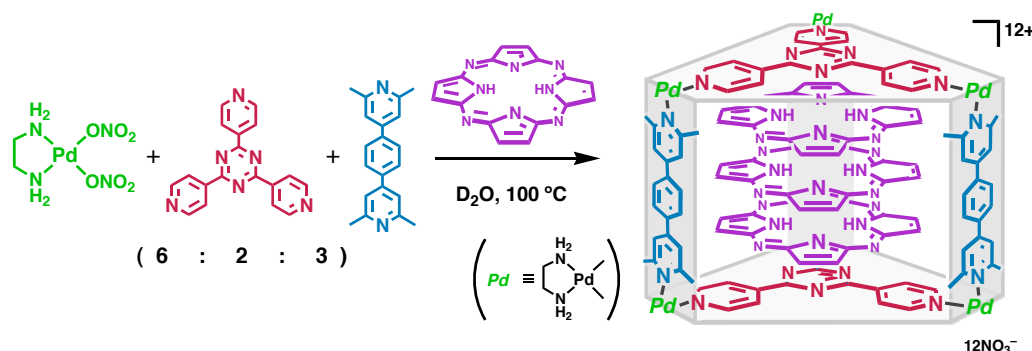

Typical procedure: (en)Pd(NO<sub>3</sub>)<sub>2</sub> (**4**, 17.43 mg; 60.0  $\mu$ mol), tris(4-pyridyl)triazine (**2**, 6.25 mg; 20.0  $\mu$ mol), 1,4-bis(2,6-dimethyl-4-pyridyl)benzene (**3**, 8.65 mg; 15.0  $\mu$ mol), and tetrazaporphine (**6a**, 12.56 mg; 40.0  $\mu$ mol, 4 eq. per **1**) was suspended in a D<sub>2</sub>O solution (1.0 mL) and the mixture was stirred at 100 °C for 2 h. After filtration of the dark purple solution, the <sup>1</sup>H NMR spectrum revealed the selective formation of 1D(**6a**)<sub>3</sub> complex. The solution was evaporated and dried by vacuum freeze-drying equipment to give a purple solid of 1D(**6a**)<sub>3</sub> complex (37.9 mg; 9.08  $\mu$ mol) in 91% yield.

Physical data of 1D(**6a**)<sub>3</sub>: <sup>1</sup>H NMR (500 MHz, D<sub>2</sub>O, 27 °C):  $\delta$  8.95 (s, 12H, **1**), 8.65 (s, 12H, **1**), 8.27 (d,  $J$  = 5.0 Hz, 12H, **1**), 7.26 (s, 16H, **6a**), 7.20 (s, 8H, **6a**), 5.91 (d,  $J$  = 5.0 Hz, 12H, **1**), 3.80 (s, 36H, **1**), 2.91 (br, 12H, **1**), 2.72 (br, 12H, **1**); <sup>13</sup>C NMR (125 MHz, D<sub>2</sub>O, 27 °C):  $\delta$  163.8 (C<sub>q</sub>, **1**), 160.8 (C<sub>q</sub>, **1**), 151.7 (CH, **1**), 150.9 (C<sub>q</sub>, **1**), 140.6 (C<sub>q</sub>, **1**), 137.6 (C<sub>q</sub>, **1**), 132.8

(C<sub>q</sub>, **6a**), 129.2 (CH, **1**), 128.1 (CH, **6a**), 122.8 (CH, **1**), 122.3 (CH, **1**), 47.7 (CH<sub>2</sub>, **1**), 46.2 (CH<sub>2</sub>, **1**), 26.1 (CH<sub>3</sub>, **1**); DOSY-NMR (cm<sup>2</sup>/s): *D* = -9.85; IR (ATR, cm<sup>-1</sup>): 3429 (br), 3213 (br), 3102 (br), 1615, 1519, 1329, 1157, 1053, 828; m.p.: ~200 °C (decomposed); CSI-MS (H<sub>2</sub>O:DMF = 20:1): *m/z* 4170.7 [1D(**6a**)<sub>3</sub>-3•NO<sub>3</sub><sup>-</sup>]<sup>3+</sup>, 1327.3 [1D(**6a**)<sub>3</sub>-3•NO<sub>3</sub><sup>-</sup>+DMF]<sup>3+</sup>, 1352.8 [1D(**6a**)<sub>3</sub>-3•NO<sub>3</sub><sup>-</sup>+2•DMF]<sup>3+</sup>, 1377.0 [1D(**6a**)<sub>3</sub>-4•NO<sub>3</sub><sup>-</sup>+DMF]<sup>4+</sup>, 998.2 [1D(**6a**)<sub>3</sub>-4•NO<sub>3</sub><sup>-</sup>+2•DMF]<sup>4+</sup>, 1017.5 [1D(**6a**)<sub>3</sub>-4•NO<sub>3</sub><sup>-</sup>+3•DMF]<sup>4+</sup>, 1035.0 [1D(**6a**)<sub>3</sub>-4•NO<sub>3</sub><sup>-</sup>+4•DMF]<sup>4+</sup>, 1053.3 [1D(**6a**)<sub>3</sub>-4•NO<sub>3</sub><sup>-</sup>+5•DMF]<sup>4+</sup>, 1071.7 [1D(**6a**)<sub>3</sub>-5•NO<sub>3</sub><sup>-</sup>+2•DMF]<sup>5+</sup>, 802.0 [1D(**6a**)<sub>3</sub>-5•NO<sub>3</sub><sup>-</sup>+3•DMF]<sup>5+</sup>, 816.9 [1D(**6a**)<sub>3</sub>-5•NO<sub>3</sub><sup>-</sup>+4•DMF]<sup>5+</sup>, 830.2 [1D(**6a**)<sub>3</sub>-5•NO<sub>3</sub><sup>-</sup>+5•DMF]<sup>5+</sup>, 845.0 [1D(**6a**)<sub>3</sub>-5•NO<sub>3</sub><sup>-</sup>+6•DMF]<sup>5+</sup>, 859.4 [1D(**6a**)<sub>3</sub>-6•NO<sub>3</sub><sup>-</sup>+2•DMF]<sup>6+</sup>, 657.8 [1D(**6a**)<sub>3</sub>-6•NO<sub>3</sub><sup>-</sup>+3•DMF]<sup>6+</sup>, 669.5 [1D(**6a**)<sub>3</sub>-6•NO<sub>3</sub><sup>-</sup>+8•DMF]<sup>6+</sup>, 730.6 [1D(**6a**)<sub>3</sub>-6•NO<sub>3</sub><sup>-</sup>+10•DMF]<sup>6+</sup>, 755.8 [1D(**6a**)<sub>3</sub>-7•NO<sub>3</sub><sup>-</sup>+5•DMF]<sup>7+</sup>, 587.0 [1D(**6a**)<sub>3</sub>-7•NO<sub>3</sub><sup>-</sup>+6•DMF]<sup>7+</sup>, 596.8 [1D(**6a**)<sub>3</sub>-7•NO<sub>3</sub><sup>-</sup>+7•DMF]<sup>7+</sup>, 606.6 [1D(**6a**)<sub>3</sub>-7•NO<sub>3</sub><sup>-</sup>+8•DMF]<sup>7+</sup>, 617.4 [1D(**6a**)<sub>3</sub>-7•NO<sub>3</sub><sup>-</sup>+9•DMF]<sup>7+</sup>, 627.7 [1D(**6a**)<sub>3</sub>-7•NO<sub>3</sub><sup>-</sup>+10•DMF]<sup>7+</sup>, 638.2 [1D(**6a**)<sub>3</sub>-7•NO<sub>3</sub><sup>-</sup>+11•DMF]<sup>7+</sup>, 648.5 [1D(**6a**)<sub>3</sub>-8•NO<sub>3</sub><sup>-</sup>+7•DMF]<sup>8+</sup>, 523.2 [1D(**6a**)<sub>3</sub>-8•NO<sub>3</sub><sup>-</sup>+8•DMF]<sup>8+</sup>, 533.3 [1D(**6a**)<sub>3</sub>-8•NO<sub>3</sub><sup>-</sup>+11•DMF]<sup>8+</sup>, 560.1 [1D(**6a**)<sub>3</sub>-8•NO<sub>3</sub><sup>-</sup>+12•DMF]<sup>8+</sup>, 568.5; UV-vis (H<sub>2</sub>O, nm): λ<sub>max</sub> 621 (ε = 1.5 × 10<sup>4</sup>), 544 (ε = 2.0 × 10<sup>4</sup>).

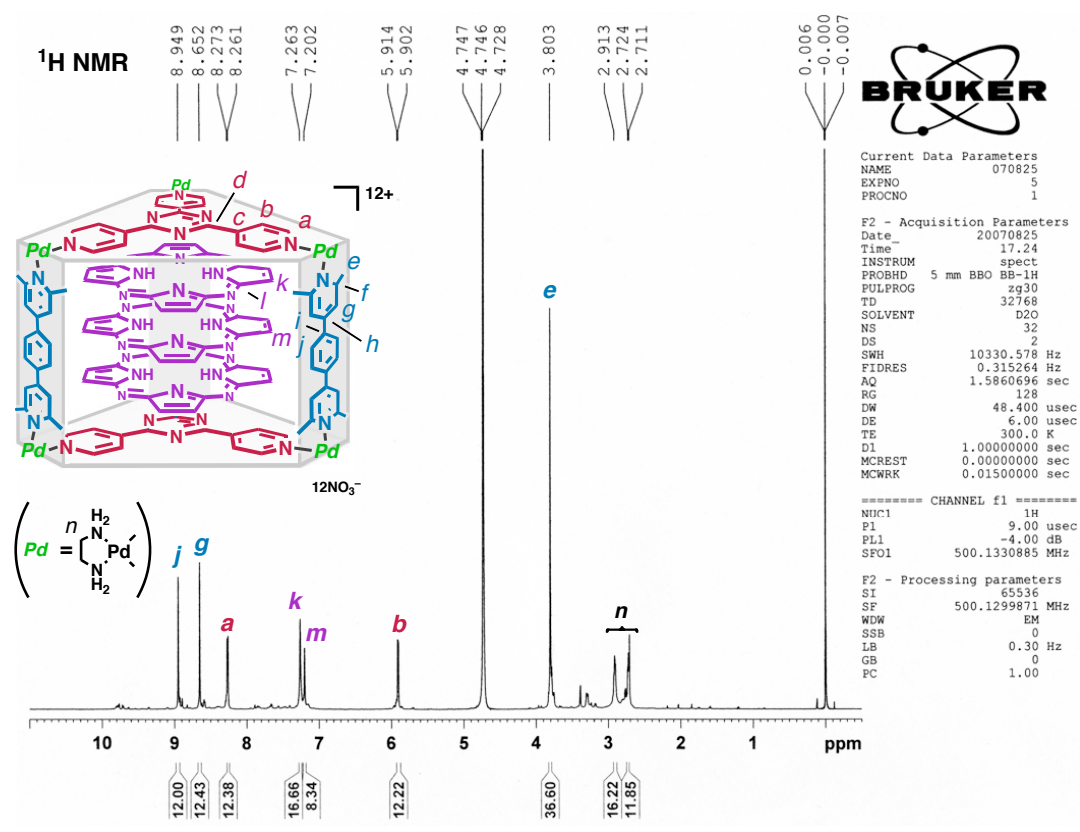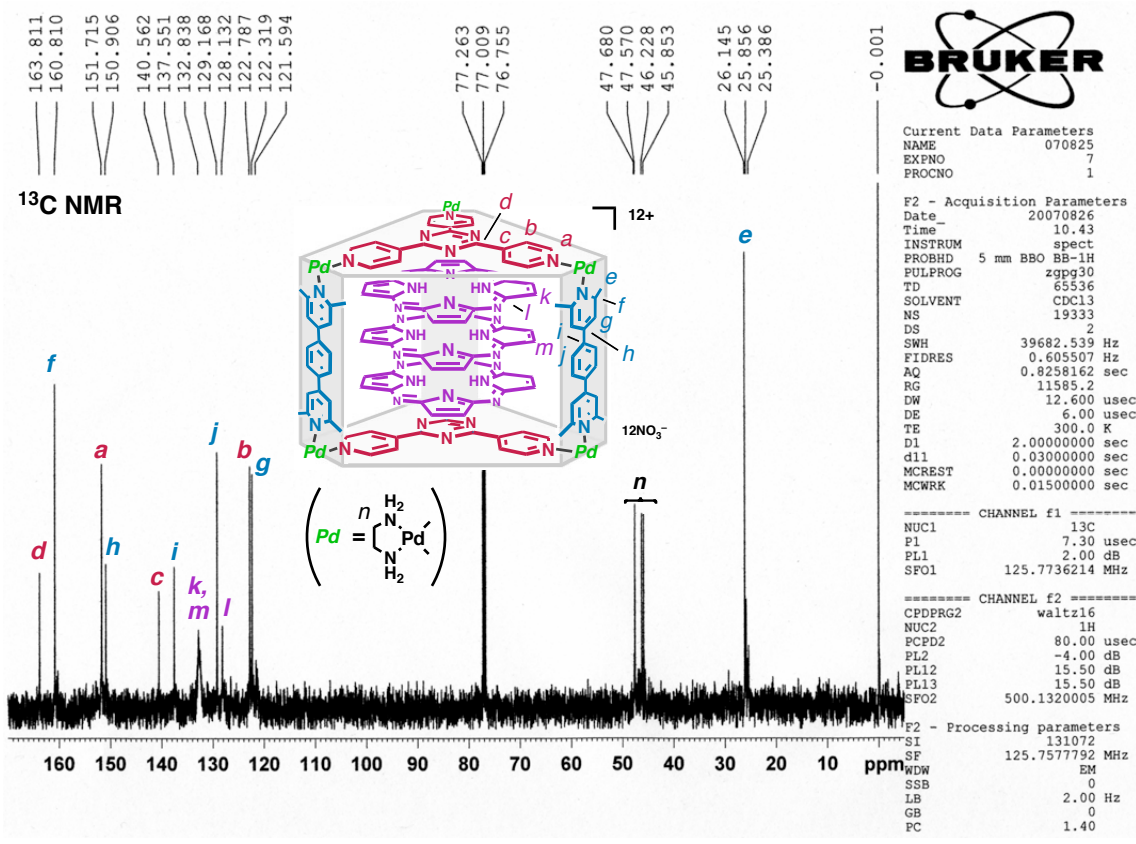

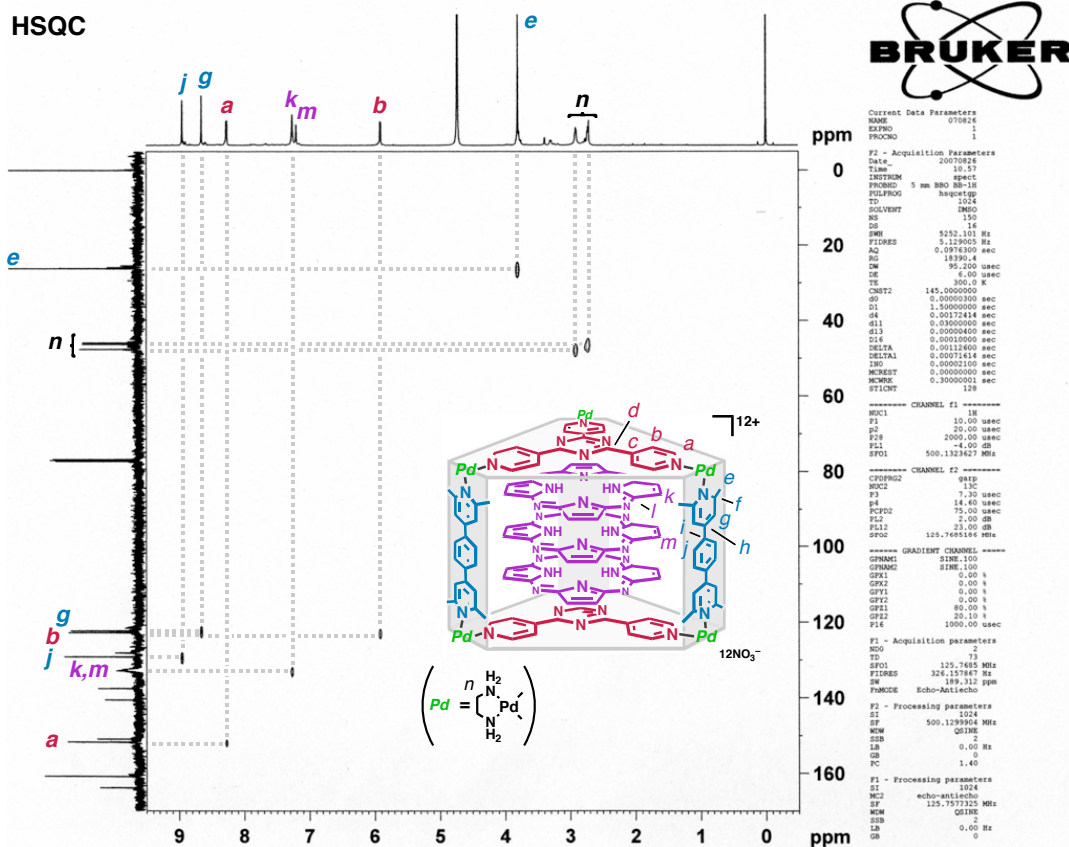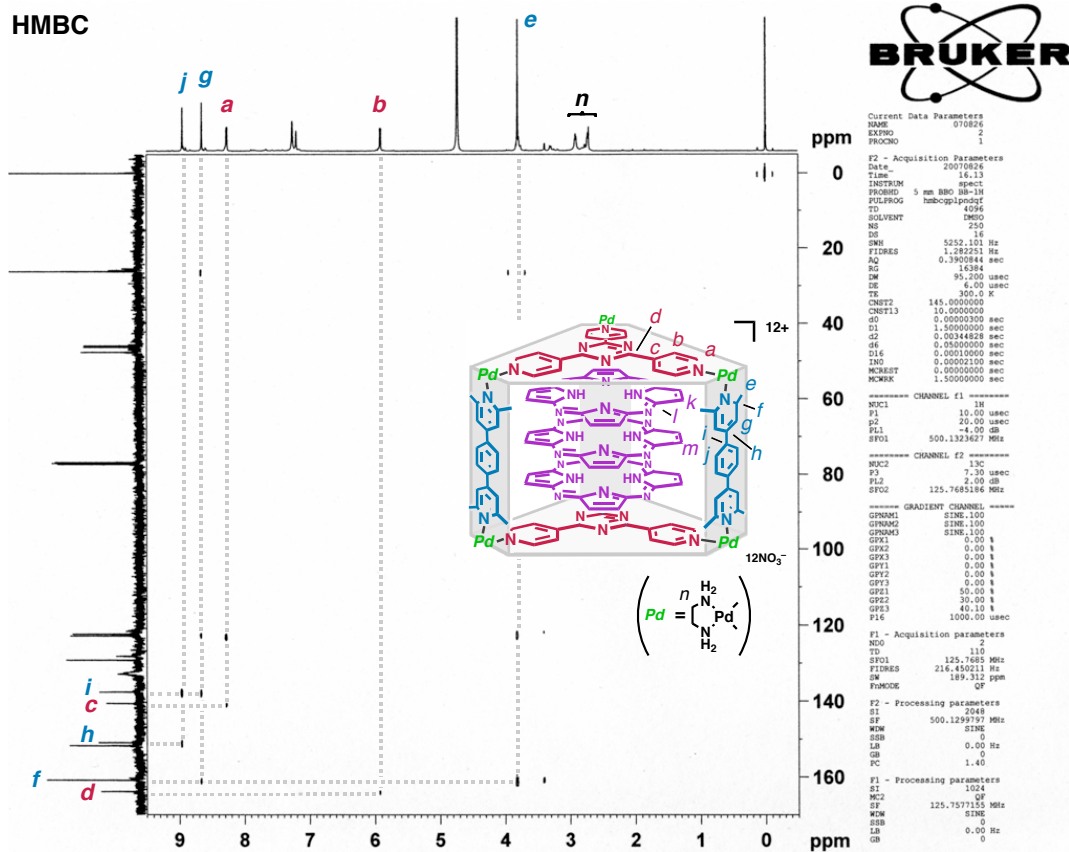

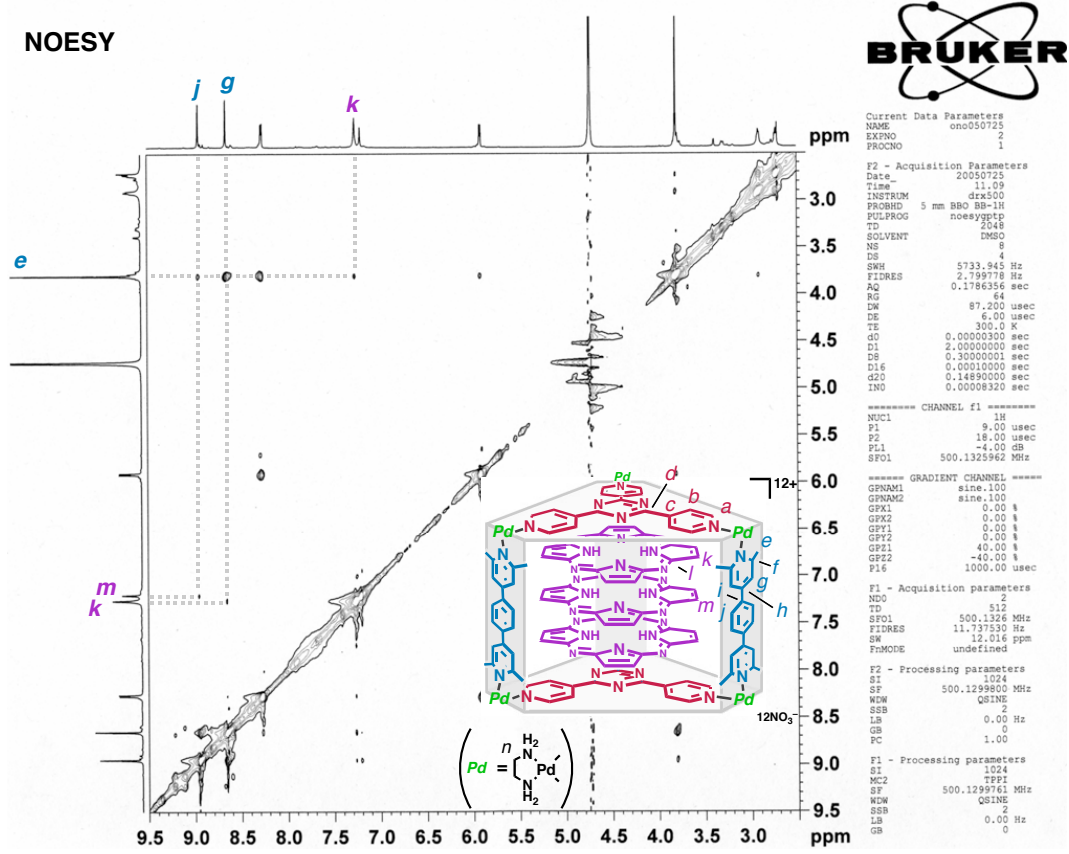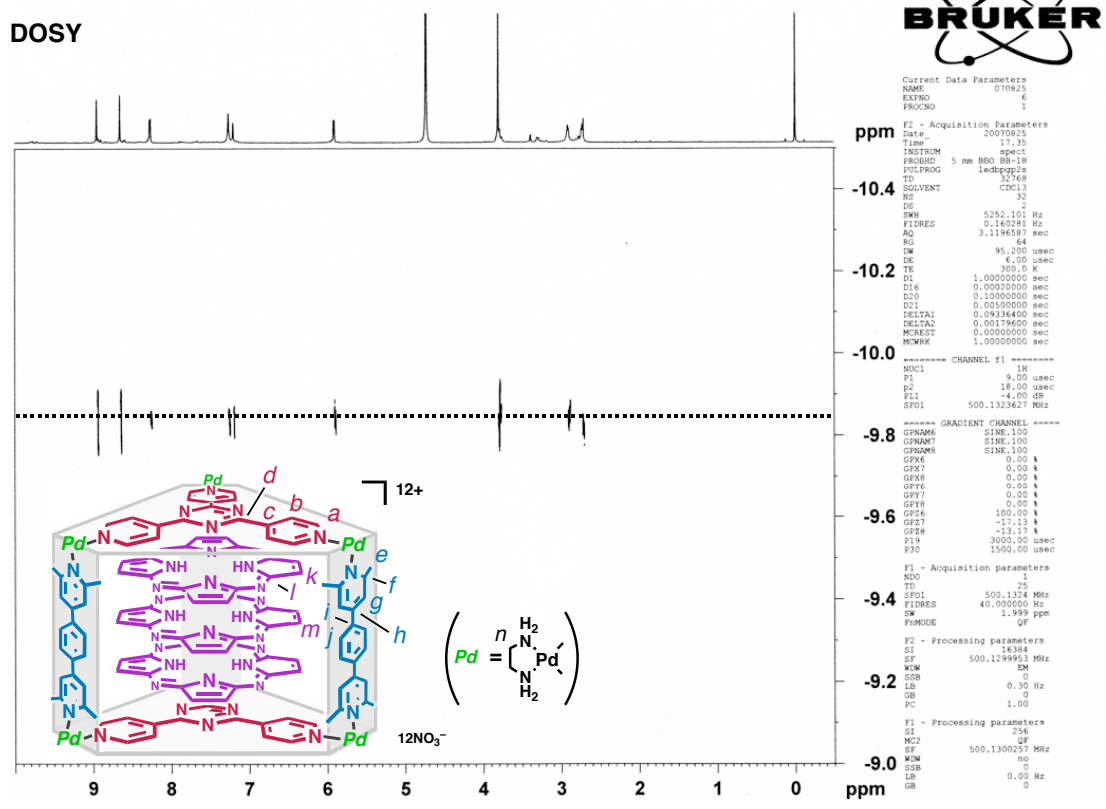

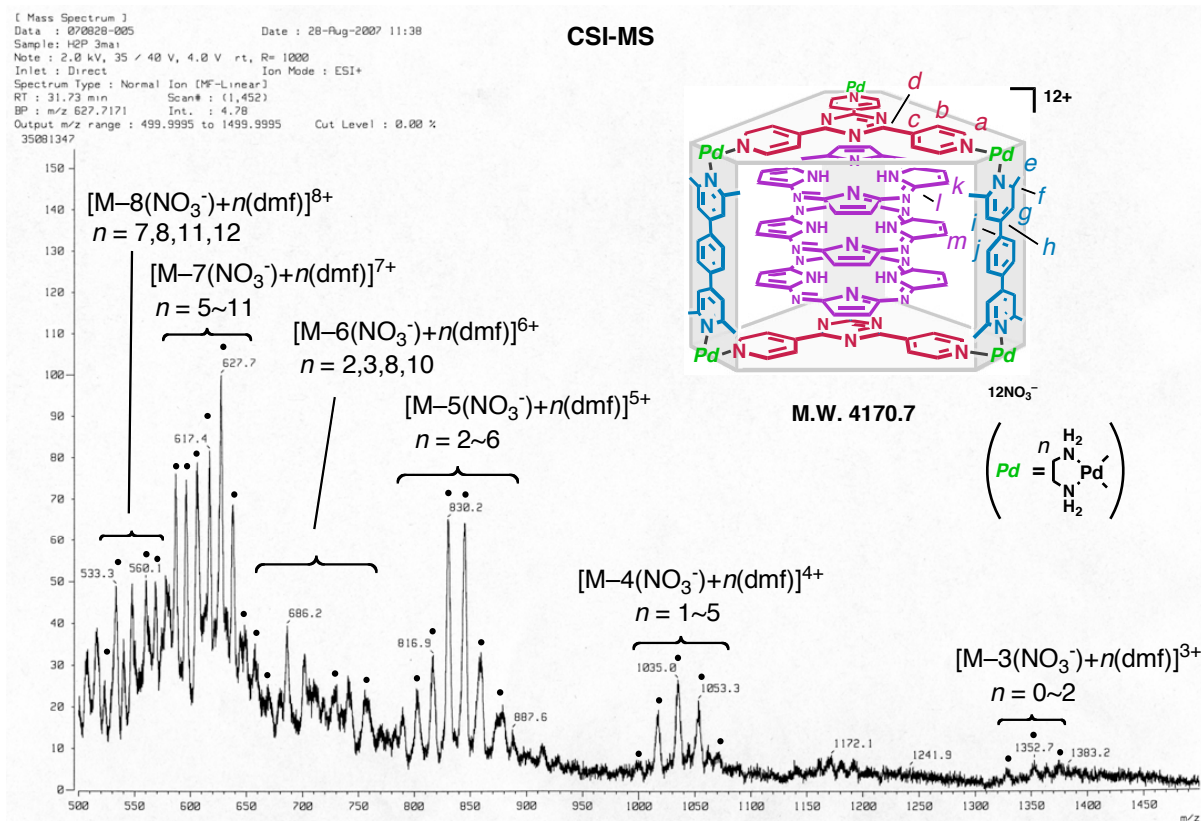

UV-vis (H<sub>2</sub>O, r.t., 0.5 mM, l = 1 mm)

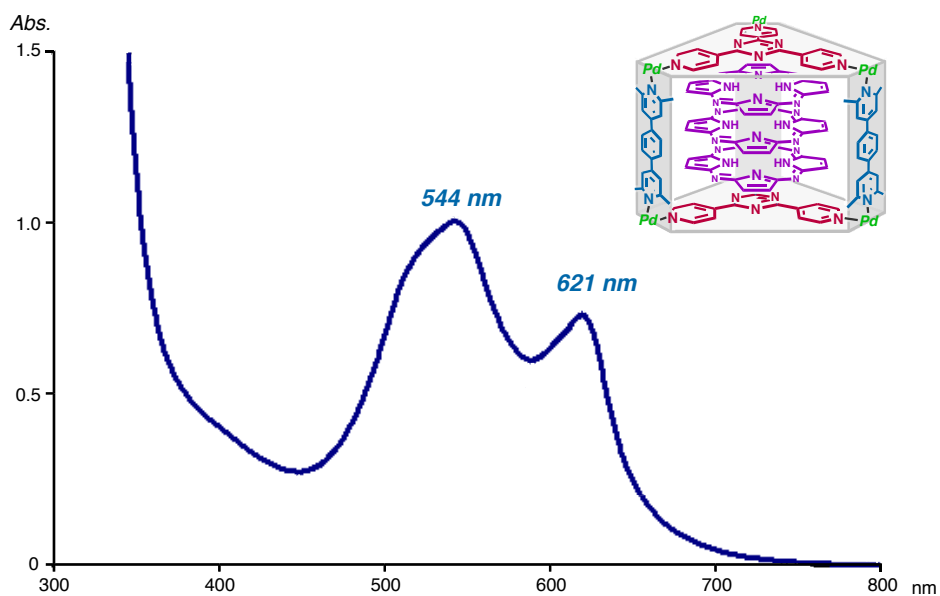

■ Physical data of  $1\text{D}(\mathbf{6b})_3$ :

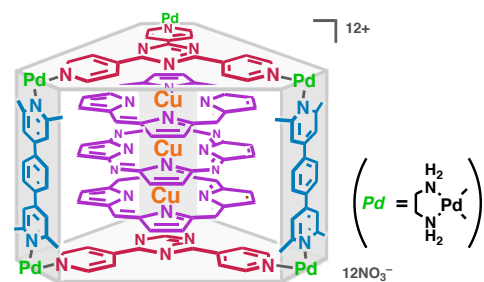

|        |                     |       |        |                                                                   |        |
|--------|---------------------|-------|--------|-------------------------------------------------------------------|--------|
| CSI-MS | $(H_2O:DMF = 20:1)$ | $m/z$ | 4360.5 | $[1\text{D}(\mathbf{6b})_3-3\bullet NO_3^-]^{3+}$ ,               | 1390.5 |
|        |                     |       | 1415.7 | $[1\text{D}(\mathbf{6b})_3-4\bullet NO_3^-+2\bullet DMF]^{4+}$ ,  | 1064.5 |
|        |                     |       | 1082.3 | $[1\text{D}(\mathbf{6b})_3-4\bullet NO_3^-+3\bullet DMF]^{4+}$ ,  | 1100.5 |
|        |                     |       | 825.6  | $[1\text{D}(\mathbf{6b})_3-5\bullet NO_3^-+4\bullet DMF]^{5+}$ ,  | 869.2  |
|        |                     |       | 882.9  | $[1\text{D}(\mathbf{6b})_3-5\bullet NO_3^-+5\bullet DMF]^{5+}$ ,  | 898.1  |
|        |                     |       | 912.3  | $[1\text{D}(\mathbf{6b})_3-5\bullet NO_3^-+7\bullet DMF]^{5+}$ ,  | 926.1  |
|        |                     |       | 941.4  | $[1\text{D}(\mathbf{6b})_3-5\bullet NO_3^-+9\bullet DMF]^{5+}$ ,  | 750.4  |
|        |                     |       | 761.9  | $[1\text{D}(\mathbf{6b})_3-6\bullet NO_3^-+7\bullet DMF]^{6+}$ ,  | 774.3  |
|        |                     |       | 786.5  | $[1\text{D}(\mathbf{6b})_3-6\bullet NO_3^-+8\bullet DMF]^{6+}$ ,  | 798.5  |
|        |                     |       | 644.6  | $[1\text{D}(\mathbf{6b})_3-6\bullet NO_3^-+10\bullet DMF]^{6+}$ , | 654.9  |
|        |                     |       | 665.5  | $[1\text{D}(\mathbf{6b})_3-7\bullet NO_3^-+8\bullet DMF]^{7+}$ ,  | 675.6  |
|        |                     |       | 686.1  | $[1\text{D}(\mathbf{6b})_3-7\bullet NO_3^-+10\bullet DMF]^{7+}$ , | 696.5  |
|        |                     |       | 707.1  | $[1\text{D}(\mathbf{6b})_3-7\bullet NO_3^-+12\bullet DMF]^{7+}$ , | 556.7  |
|        |                     |       |        | $[1\text{D}(\mathbf{6b})_3-7\bullet NO_3^-+14\bullet DMF]^{7+}$ , |        |
|        |                     |       |        | $[1\text{D}(\mathbf{6b})_3-8\bullet NO_3^-+8\bullet DMF]^{8+}$ ,  |        |
|        |                     |       |        | $[1\text{D}(\mathbf{6b})_3-8\bullet NO_3^-+9\bullet DMF]^{8+}$ ,  |        |

$12NO_3^-$   
 IR (ATR,  $cm^{-1}$ ): 3424 (br), 3206 (br), 3103 (br), 1679, 1615, 1524, 1331(br), 1196, 1057, 1130, 1057, 987; m.p.:  $\sim 200$  °C (decomposed); UV-vis ( $H_2O$ , nm):  $\lambda_{max}$  555 ( $\epsilon = 1.9 \times 10^4$ ).



[ Mass Spectrum ]  
 Date : 070914-004 Date : 14-Sep-2007 11:39  
 Sample: CuT CuT CuT 3ma  
 Note : 2.0 kV, 30 / 80 V, 4.0 V rt, R= 1000  
 Inlet : Direct Ion Mode : ESI+  
 Spectrum Type : Normal Ion [MF-Linear]  
 RT : 60.02 min Scan# : (1,854)  
 BP : m/z 620.0836 Int. : 5.73  
 Output m/z range : 537.0374 to 1500.1058 Cut Level : 0.00 %  
 75055747

CSI-MS

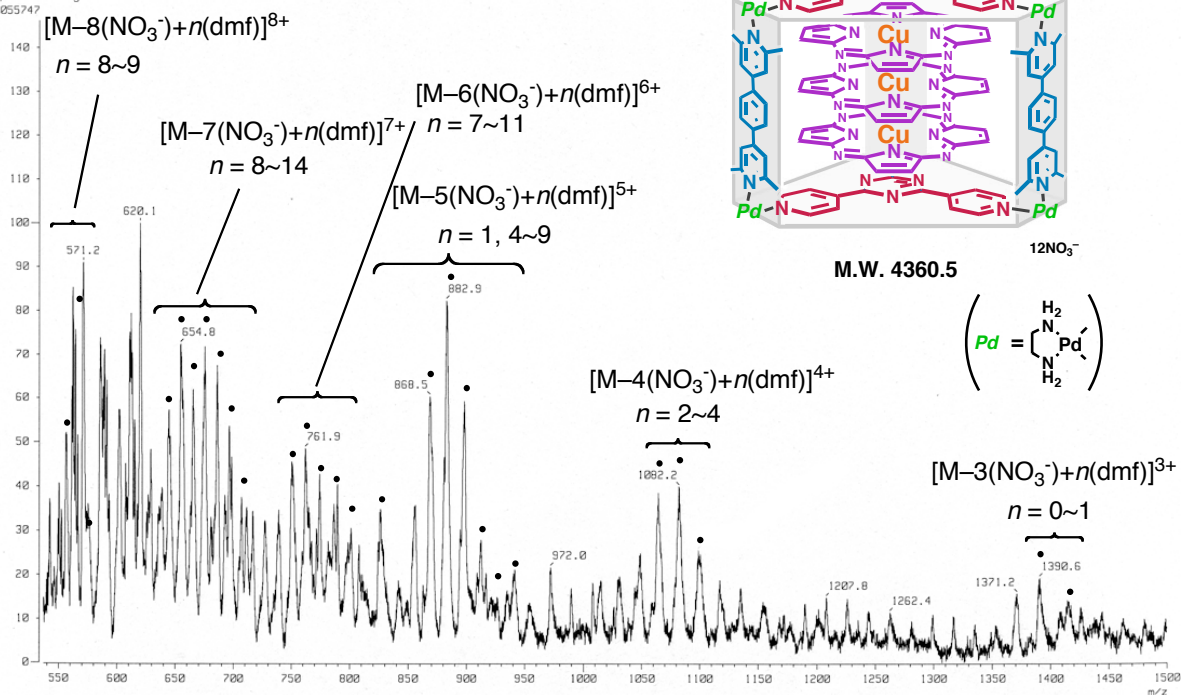

UV-vis ( $\text{H}_2\text{O}$ , r.t., 0.5 mM, l = 1 mm)

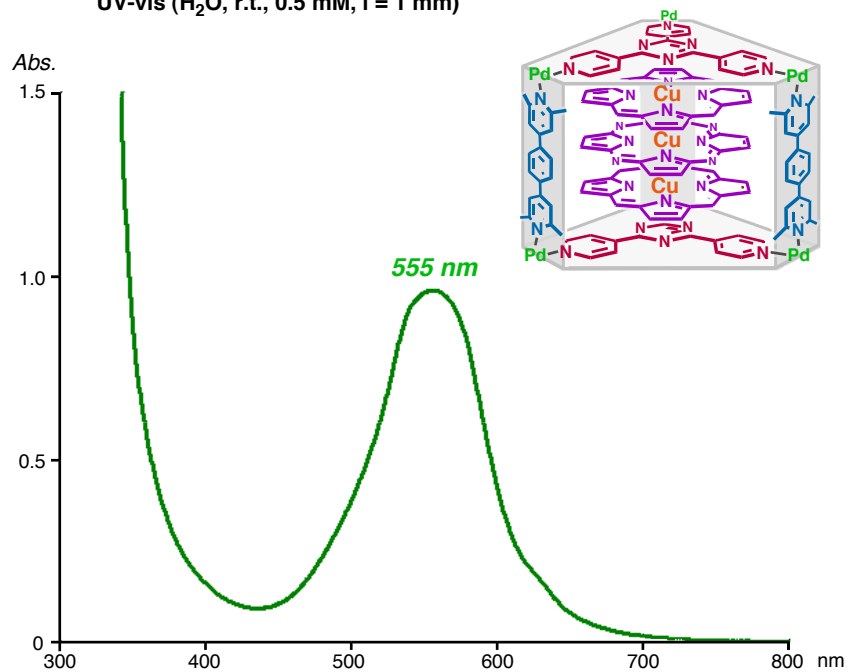

■ UV spectrum of  $1\text{D}(\mathbf{6b})_3$  :

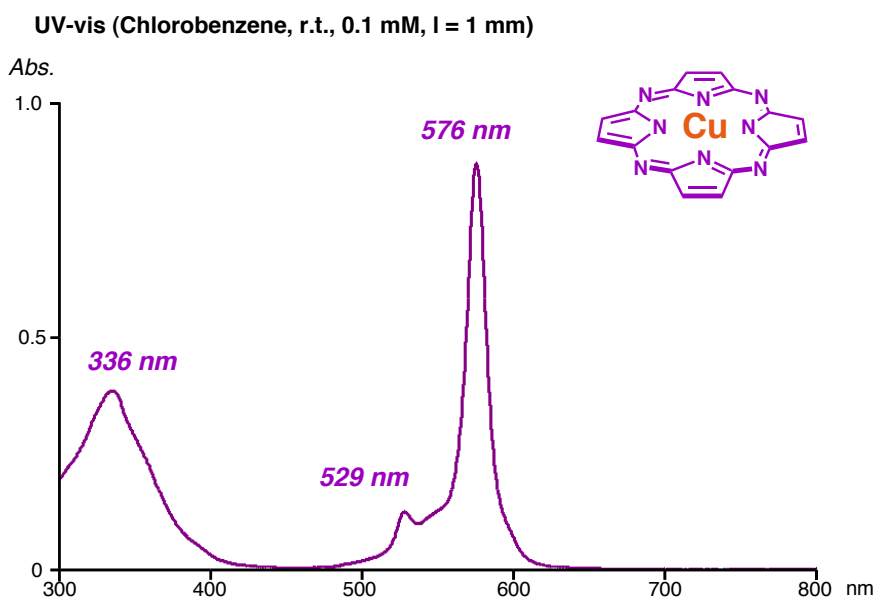

UV-vis ( $\text{H}_2\text{O}$ , nm):  $\lambda_{\text{max}}$  576 ( $\epsilon = 8.8 \times 10^4$ ), 529 ( $\epsilon = 1.2 \times 10^4$ ), 336 ( $\epsilon = 3.9 \times 10^4$ ).

■ Synthesis of  $1\text{D}(\mathbf{5a}\cdot\mathbf{6a}\cdot\mathbf{5a})$ .

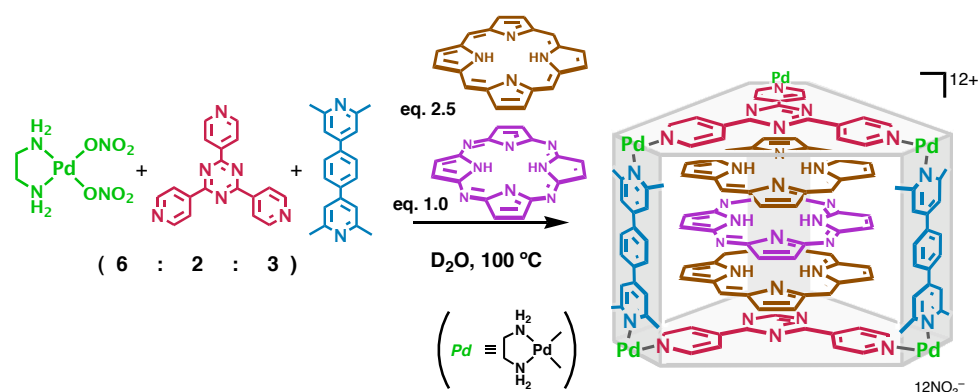

Typical procedure: (en) $\text{Pd}(\text{NO}_3)_2$  (**4**, 17.43 mg; 60.0  $\mu\text{mol}$ ), tris(4-pyridyl)triazine (**2**, 6.25 mg; 20.0  $\mu\text{mol}$ ), 1,4-bis(2,6-dimethyl-4-pyridyl)benzene (**3**, 8.65 mg; 15.0  $\mu\text{mol}$ ), tetrazaporphine (**6a**, 3.14 mg; 10.0  $\mu\text{mol}$ , 1 eq. per **1**), and porphine (**5a**, 7.75 mg; 25  $\mu\text{mol}$ , 2.5 eq. per **1**) was suspended in a  $\text{D}_2\text{O}$  solution (1.0 mL) and the mixture was stirred at 100 °C for 2 h. After decantation of the solution,  $^1\text{H}$  NMR spectrum of the resolved dark red-purple precipitation revealed the selective formation of  $1\text{D}(\mathbf{5a}\cdot\mathbf{6a}\cdot\mathbf{5a})$  complex. The solution was evaporated and dried by vacuum freeze-drying equipment to give a red-purple solid of  $1\text{D}(\mathbf{5a}\cdot\mathbf{6a}\cdot\mathbf{5a})$  complex (13.2 mg; 3.17  $\mu\text{mol}$ ) in 31% yield.

Physical data of  $1\text{D}(\mathbf{5a}\cdot\mathbf{6a}\cdot\mathbf{5a})$ :  $^1\text{H}$  NMR (500 MHz,  $\text{D}_2\text{O}$ , 27 °C):  $\delta$  8.98 (s, 12H, **1**), 8.77 (s,

12H, **1**), 8.10 (d,  $J = 5.0\text{Hz}$ , 12H, **1**), 7.53 (s, 8H, **5a**), 7.31 (s, 16H, **5a**), 6.65 (s, 8H, **6a**), 5.49 (d,  $J = 5.0\text{Hz}$ , 12H, **1**), 3.86 (s, 36H, **1**), 2.91 (br, 12H, **1**), 2.71 (br, 12H, **1**);  $^{13}\text{C}$  NMR (125 MHz,  $\text{D}_2\text{O}$ ,  $27^\circ\text{C}$ ):  $\delta$  162.6 ( $\text{C}_q$ , **1**), 160.9 ( $\text{C}_q$ , **1**), 151.7 ( $\text{C}_q$ , **3a**), 151.2 ( $\text{C}_q$ , **1**), 150.7 (CH, **1**), 140.8 ( $\text{C}_q$ , **1**), 137.5 ( $\text{C}_q$ , **1**), 132.1 (CH, **6a**), 129.2 (CH, **1**), 128.2 ( $\text{C}_q$ , **6a**), 122.7 (CH, **1**), 122.3 (CH, **1**), 121.7 (CH, **5a**), 100.6 (CH, **5a**), 47.4 ( $\text{CH}_2$ , **1**), 46.2 ( $\text{CH}_2$ , **1**), 26.1 ( $\text{CH}_3$ , **1**); DOSY-NMR ( $\text{cm}^2/\text{s}$ ):  $D = -9.85$ ; IR (ATR,  $\text{cm}^{-1}$ ): 3452 (br), 3206 (br), 3107 (br), 1659, 1613, 1514, 1329, 1139, 1055, 949; m.p.:  $\sim 200^\circ\text{C}$  (decomposed); CSI-MS ( $\text{H}_2\text{O}:\text{DMF} = 20:1$ ):  $m/z$

|        |                                                                                                         |        |                                                                                                         |        |
|--------|---------------------------------------------------------------------------------------------------------|--------|---------------------------------------------------------------------------------------------------------|--------|
| 4168.0 | $[\text{1D}(\mathbf{5a}\cdot\mathbf{6a}\cdot\mathbf{5a})-3\cdot\text{NO}_3^-]^{3+}$ ,                   | 1327.4 | $[\text{1D}(\mathbf{5a}\cdot\mathbf{6a}\cdot\mathbf{5a})-4\cdot\text{NO}_3^-+2\cdot\text{DMF}]^{4+}$ ,  | 1017.3 |
|        | $[\text{1D}(\mathbf{3a}\cdot\mathbf{2a}\cdot\mathbf{3a})-4\cdot\text{NO}_3^-+3\cdot\text{DMF}]^{4+}$ ,  | 1035.2 | $[\text{1D}(\mathbf{5a}\cdot\mathbf{6a}\cdot\mathbf{5a})-4\cdot\text{NO}_3^-+4\cdot\text{DMF}]^{4+}$ ,  | 1053.7 |
|        | $[\text{1D}(\mathbf{3a}\cdot\mathbf{2a}\cdot\mathbf{3a})-4\cdot\text{NO}_3^-+5\cdot\text{DMF}]^{4+}$ ,  | 1071.9 | $[\text{1D}(\mathbf{5a}\cdot\mathbf{6a}\cdot\mathbf{5a})-4\cdot\text{NO}_3^-+6\cdot\text{DMF}]^{4+}$ ,  | 1089.4 |
|        | $[\text{1D}(\mathbf{3a}\cdot\mathbf{2a}\cdot\mathbf{3a})-5\cdot\text{NO}_3^-+3\cdot\text{DMF}]^{5+}$ ,  | 816.2  | $[\text{1D}(\mathbf{5a}\cdot\mathbf{6a}\cdot\mathbf{5a})-5\cdot\text{NO}_3^-+4\cdot\text{DMF}]^{5+}$ ,  | 830.6  |
|        | $[\text{1D}(\mathbf{3a}\cdot\mathbf{2a}\cdot\mathbf{3a})-5\cdot\text{NO}_3^-+5\cdot\text{DMF}]^{5+}$ ,  | 845.0  | $[\text{1D}(\mathbf{5a}\cdot\mathbf{6a}\cdot\mathbf{5a})-5\cdot\text{NO}_3^-+6\cdot\text{DMF}]^{5+}$ ,  | 860.1  |
|        | $[\text{1D}(\mathbf{3a}\cdot\mathbf{2a}\cdot\mathbf{3a})-5\cdot\text{NO}_3^-+7\cdot\text{DMF}]^{5+}$ ,  | 874.1  | $[\text{1D}(\mathbf{5a}\cdot\mathbf{6a}\cdot\mathbf{5a})-5\cdot\text{NO}_3^-+8\cdot\text{DMF}]^{5+}$ ,  | 889.1  |
|        | $[\text{1D}(\mathbf{3a}\cdot\mathbf{2a}\cdot\mathbf{3a})-5\cdot\text{NO}_3^-+9\cdot\text{DMF}]^{5+}$ ,  | 904.1  | $[\text{1D}(\mathbf{5a}\cdot\mathbf{6a}\cdot\mathbf{5a})-5\cdot\text{NO}_3^-+10\cdot\text{DMF}]^{5+}$ , | 917.1  |
|        | $[\text{1D}(\mathbf{3a}\cdot\mathbf{2a}\cdot\mathbf{3a})-5\cdot\text{NO}_3^-+11\cdot\text{DMF}]^{5+}$ , | 933.2  | $[\text{1D}(\mathbf{5a}\cdot\mathbf{6a}\cdot\mathbf{5a})-6\cdot\text{NO}_3^-]^{6+}$ ,                   | 633.2  |
|        | $[\text{1D}(\mathbf{5a}\cdot\mathbf{6a}\cdot\mathbf{5a})-6\cdot\text{NO}_3^-+\text{DMF}]^{6+}$ ,        | 644.5  | $[\text{1D}(\mathbf{5a}\cdot\mathbf{6a}\cdot\mathbf{5a})-6\cdot\text{NO}_3^-+2\cdot\text{DMF}]^{6+}$ ,  | 656.2  |
|        | $[\text{1D}(\mathbf{5a}\cdot\mathbf{6a}\cdot\mathbf{5a})-6\cdot\text{NO}_3^-+3\cdot\text{DMF}]^{6+}$ ,  | 669.5  | $[\text{1D}(\mathbf{5a}\cdot\mathbf{6a}\cdot\mathbf{5a})-6\cdot\text{NO}_3^-+4\cdot\text{DMF}]^{6+}$ ,  | 680.8  |
|        | $[\text{1D}(\mathbf{5a}\cdot\mathbf{6a}\cdot\mathbf{5a})-6\cdot\text{NO}_3^-+5\cdot\text{DMF}]^{6+}$ ,  | 694.0  | $[\text{1D}(\mathbf{5a}\cdot\mathbf{6a}\cdot\mathbf{5a})-6\cdot\text{NO}_3^-+6\cdot\text{DMF}]^{6+}$ ,  | 706.2  |
|        | $[\text{1D}(\mathbf{5a}\cdot\mathbf{6a}\cdot\mathbf{5a})-6\cdot\text{NO}_3^-+7\cdot\text{DMF}]^{6+}$ ,  | 718.2  | $[\text{1D}(\mathbf{5a}\cdot\mathbf{6a}\cdot\mathbf{5a})-6\cdot\text{NO}_3^-+8\cdot\text{DMF}]^{6+}$ ,  | 730.7  |
|        | $[\text{1D}(\mathbf{5a}\cdot\mathbf{6a}\cdot\mathbf{5a})-6\cdot\text{NO}_3^-+9\cdot\text{DMF}]^{6+}$ ,  | 742.9  | $[\text{1D}(\mathbf{5a}\cdot\mathbf{6a}\cdot\mathbf{5a})-6\cdot\text{NO}_3^-+10\cdot\text{DMF}]^{6+}$ , | 755.1  |
|        | $[\text{1D}(\mathbf{5a}\cdot\mathbf{6a}\cdot\mathbf{5a})-7\cdot\text{NO}_3^-+3\cdot\text{DMF}]^{7+}$ ,  | 564.5  | $[\text{1D}(\mathbf{5a}\cdot\mathbf{6a}\cdot\mathbf{5a})-7\cdot\text{NO}_3^-+6\cdot\text{DMF}]^{7+}$ ,  | 596.5  |
|        | $[\text{1D}(\mathbf{5a}\cdot\mathbf{6a}\cdot\mathbf{5a})-7\cdot\text{NO}_3^-+7\cdot\text{DMF}]^{7+}$ ,  | 605.9  | $[\text{1D}(\mathbf{5a}\cdot\mathbf{6a}\cdot\mathbf{5a})-7\cdot\text{NO}_3^-+8\cdot\text{DMF}]^{7+}$ ,  | 617.5  |
|        | $[\text{1D}(\mathbf{5a}\cdot\mathbf{6a}\cdot\mathbf{5a})-7\cdot\text{NO}_3^-+9\cdot\text{DMF}]^{7+}$ ,  | 628.1  | $[\text{1D}(\mathbf{5a}\cdot\mathbf{6a}\cdot\mathbf{5a})-7\cdot\text{NO}_3^-+10\cdot\text{DMF}]^{7+}$ , | 638.5  |
|        | $[\text{1D}(\mathbf{5a}\cdot\mathbf{6a}\cdot\mathbf{5a})-7\cdot\text{NO}_3^-+11\cdot\text{DMF}]^{7+}$ , | 649.0  | $[\text{1D}(\mathbf{5a}\cdot\mathbf{6a}\cdot\mathbf{5a})-7\cdot\text{NO}_3^-+12\cdot\text{DMF}]^{7+}$ , | 659.3; |

UV-vis ( $\text{H}_2\text{O}$ , nm):  $\lambda_{\text{max}}$  619 ( $\epsilon = 6.8 \times 10^3$ ), 554 ( $\epsilon = 9.1 \times 10^3$ ), 491 ( $\epsilon = 1.1 \times 10^4$ ), 398 ( $\epsilon = 8.4 \times 10^4$ ).

<sup>1</sup>H NMR

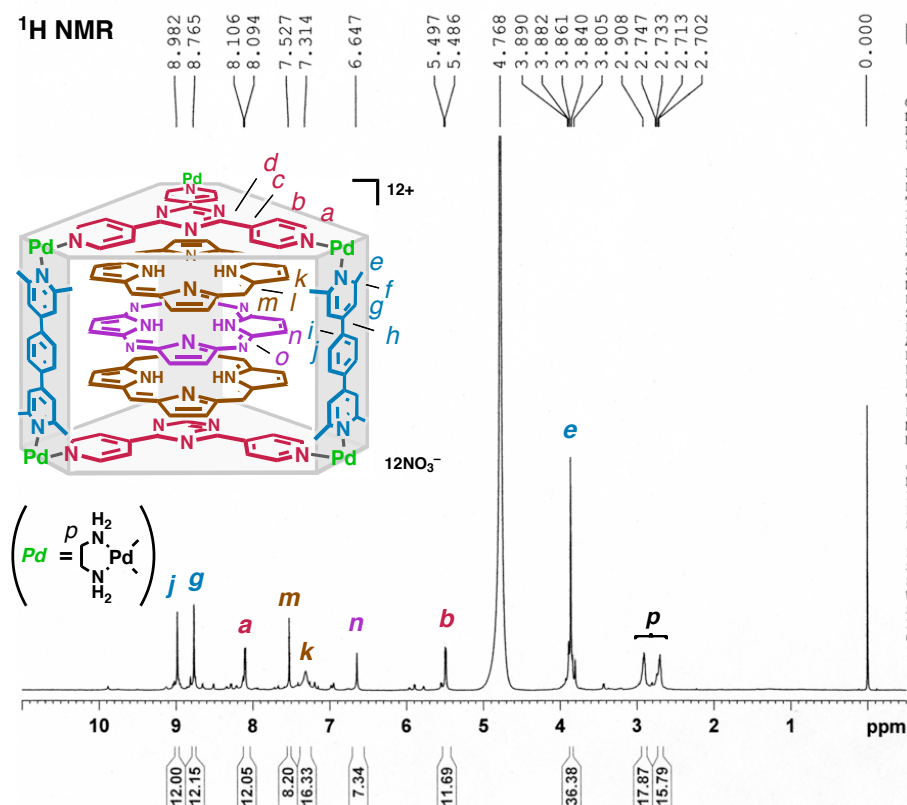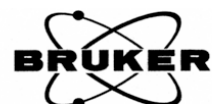

Current Data Parameters  
NAME 061217  
EXPNO 12  
PROCNO 1

F2 - Acquisition Parameters  
Date\_ 20061218  
Time\_ 9.35  
INSTRUM drx500  
PROBHD 5 mm BBO BB-1H  
PULPROG zg30  
TD 32768  
SOLVENT CDCl3  
NS 64  
DS 2  
SWH 10330.578 Hz  
FIDRES 0.315264 Hz  
AQ 1.5860696 sec  
RG 128  
DW 48.400 usec  
DE 6.00 usec  
TE 300.0 K  
D1 1.00000000 sec  
MCREST 0.00000000 sec  
MCWRK 0.01500000 sec

===== CHANNEL f1 =====  
NUC1 1H  
P1 9.00 usec  
PL1 -4.00 dB  
SFO1 500.1330885 MHz

F2 - Processing parameters  
SI 16384  
SF 500.1299668 MHz  
WDW EM  
SSB 0  
LB 0.30 Hz  
GB 0  
PC 1.00

<sup>13</sup>C NMR

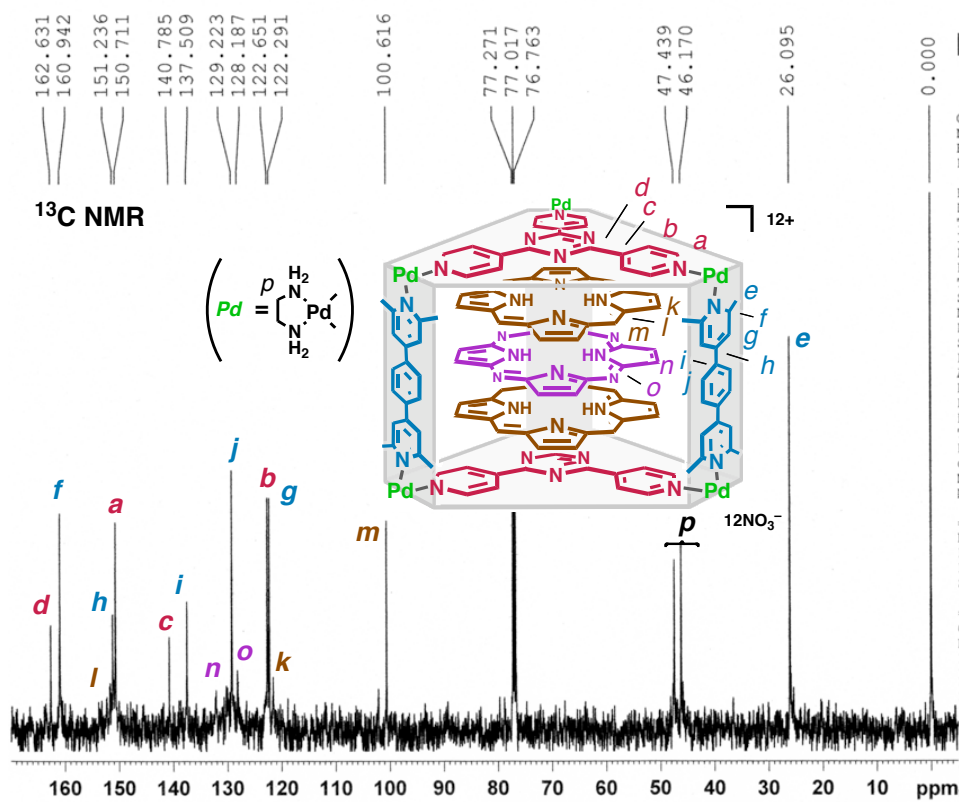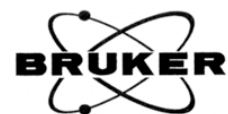

Current Data Parameters  
NAME 070901  
EXPNO 9  
PROCNO 1

F2 - Acquisition Parameters  
Date\_ 20070901  
Time\_ 22.33  
INSTRUM spect  
PROBHD 5 mm BBO BB-1H  
PULPROG zgpg30  
TD 6536  
SOLVENT CDCl3  
NS 20000  
DS 2  
SWH 25062.656 Hz  
FIDRES 0.382426 Hz  
AQ 1.3075131 sec  
RG 14596.5  
DW 19.950 usec  
DE 6.00 usec  
TE 300.1 K  
D1 2.00000000 sec  
d11 0.03000000 sec  
MCREST 0.00000000 sec  
MCWRK 0.01500000 sec

===== CHANNEL f1 =====  
NUC1 13C  
P1 7.30 usec  
PL1 2.00 dB  
SFO1 125.7684740 MHz

===== CHANNEL f2 =====  
CPDPRG2 waltz16  
NUC2 1H  
PCPD2 80.00 usec  
PL2 -4.00 dB  
PL12 15.50 dB  
PL13 15.50 dB  
SFO2 500.1320005 MHz

F2 - Processing parameters  
SI 131072  
SF 125.7577783 MHz  
WDW EM  
SSB 0  
LB 5.00 Hz  
GB 0  
PC 1.00

### HSQC

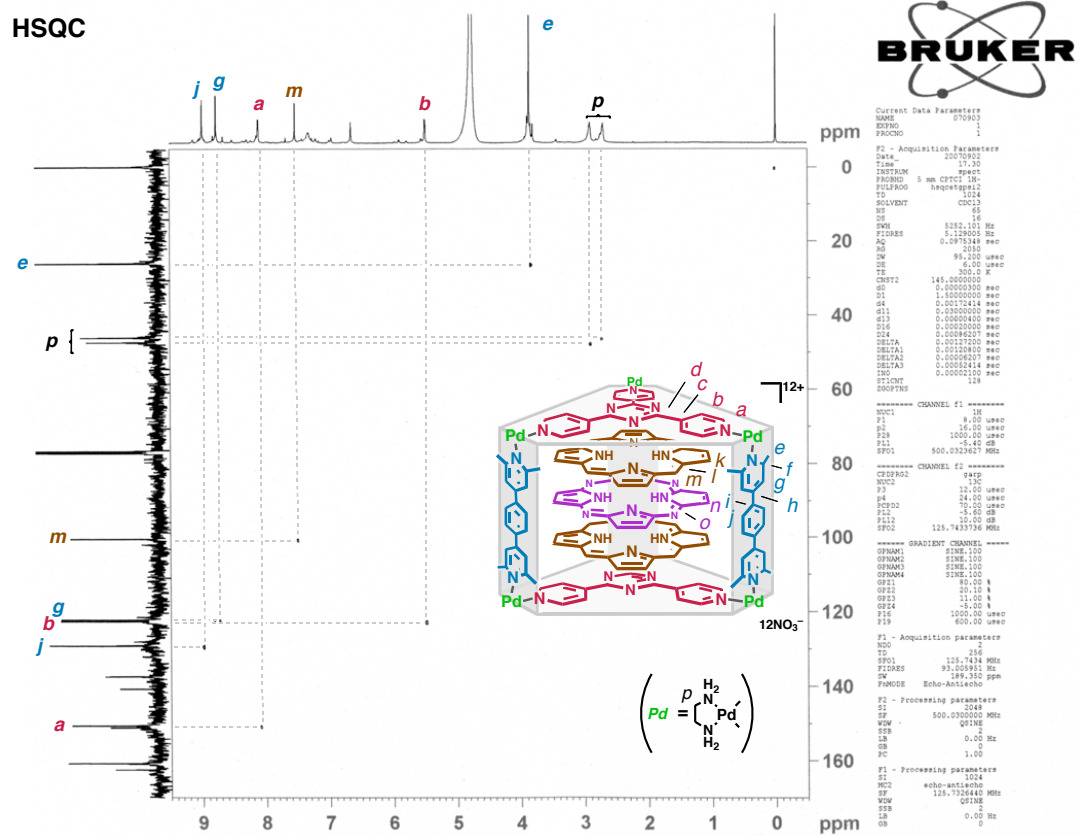

### HMQC

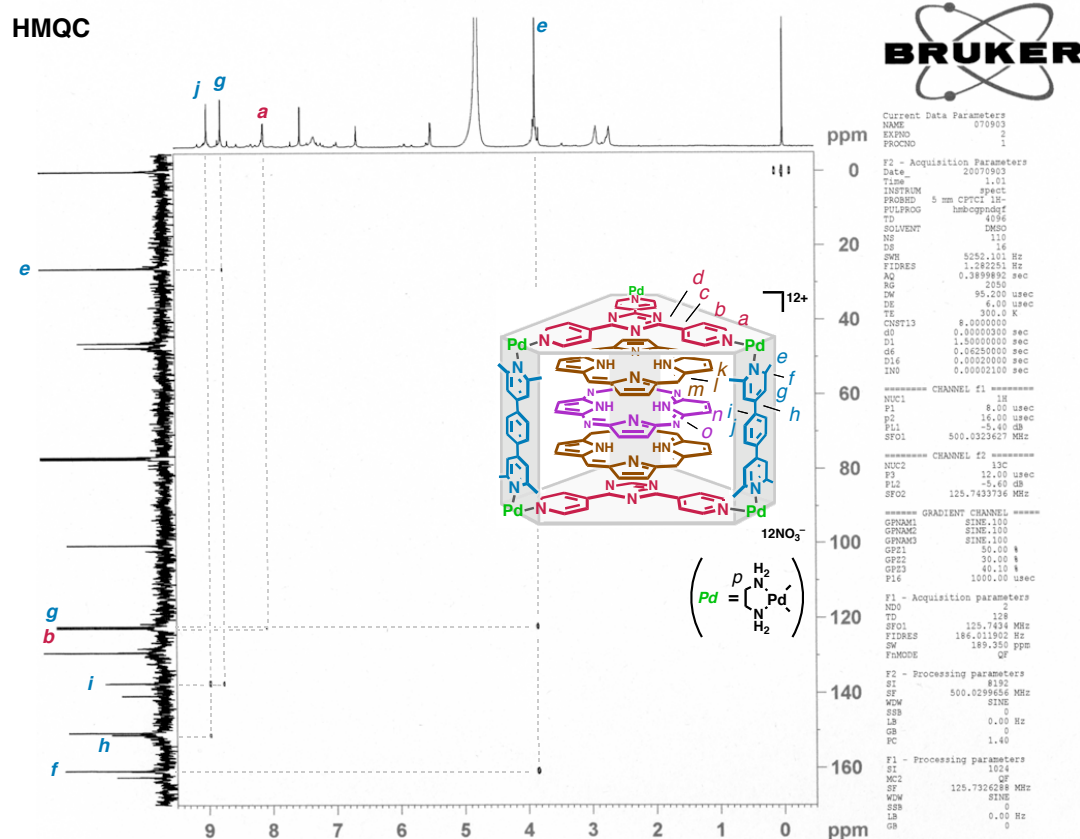

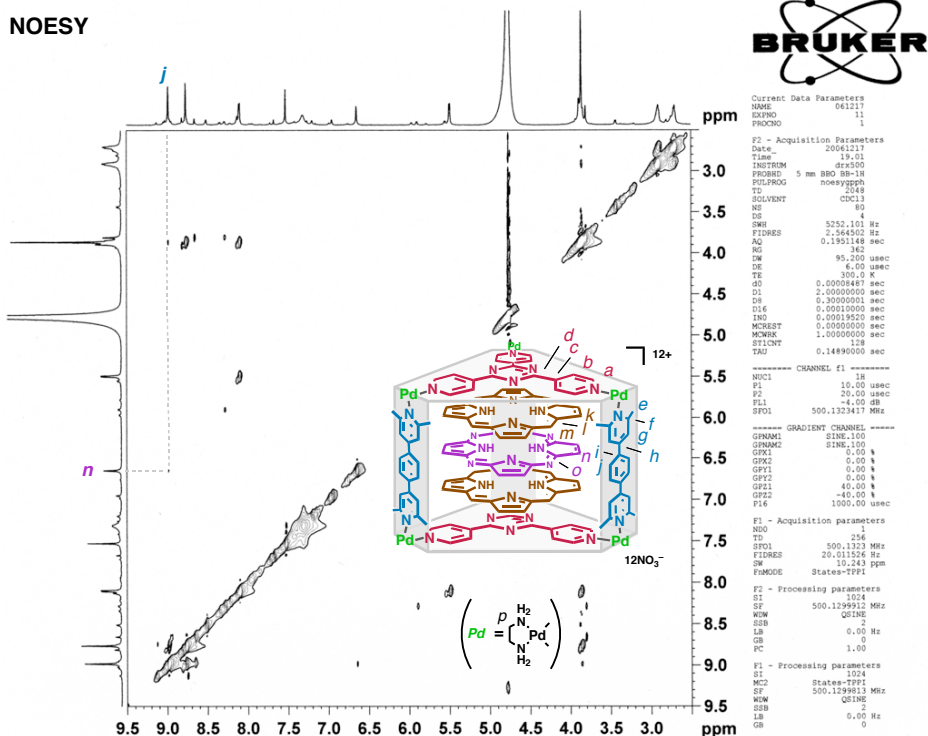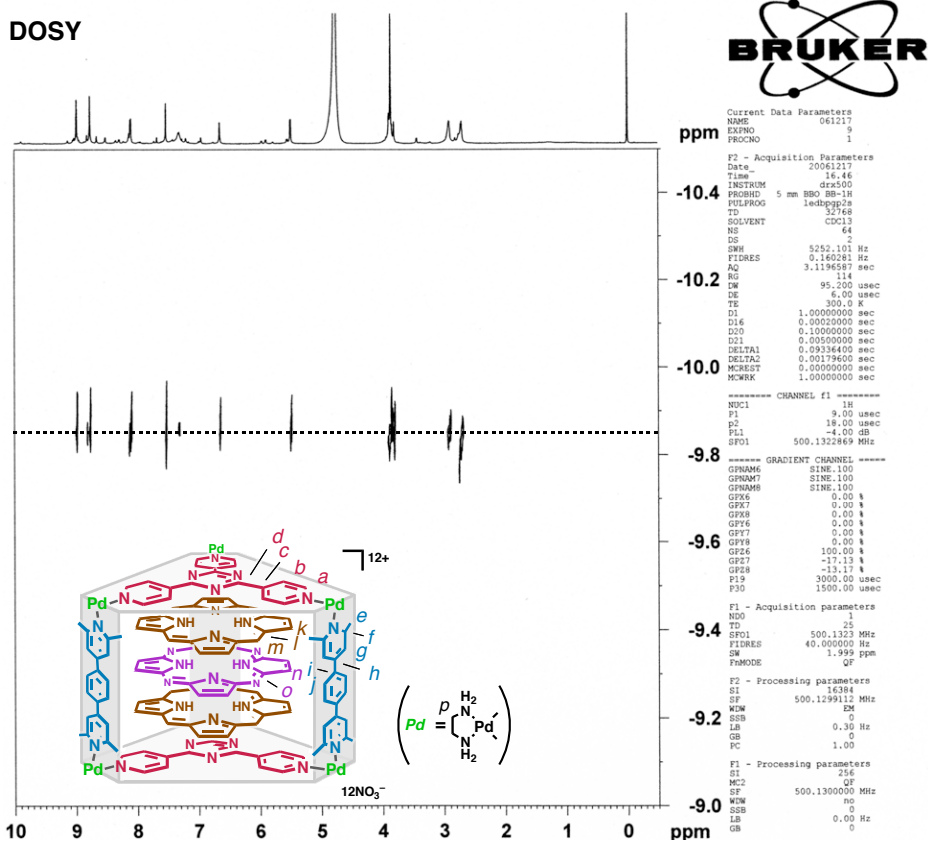

[ Mass Spectrum ]  
 Date : 061218-006 Date : 18-Dec-2006 23:00  
 Sample: H2P H2T H2P 3ma  
 Note : 2.0 kV, 20 / 100 V, 10 V rt, R= 1000  
 Inlet : Direct Ion Mode : ESI+  
 Spectrum Type : Normal Ion [MF-Linear]  
 RT : 8.15 min Scan# : (1,105)  
 BP : m/z 850,8541 Int. : 33.91  
 Output m/z range : 499.9940 to 1502.6305 Cut Level : 0.00 %  
 61668636

CSI-MS

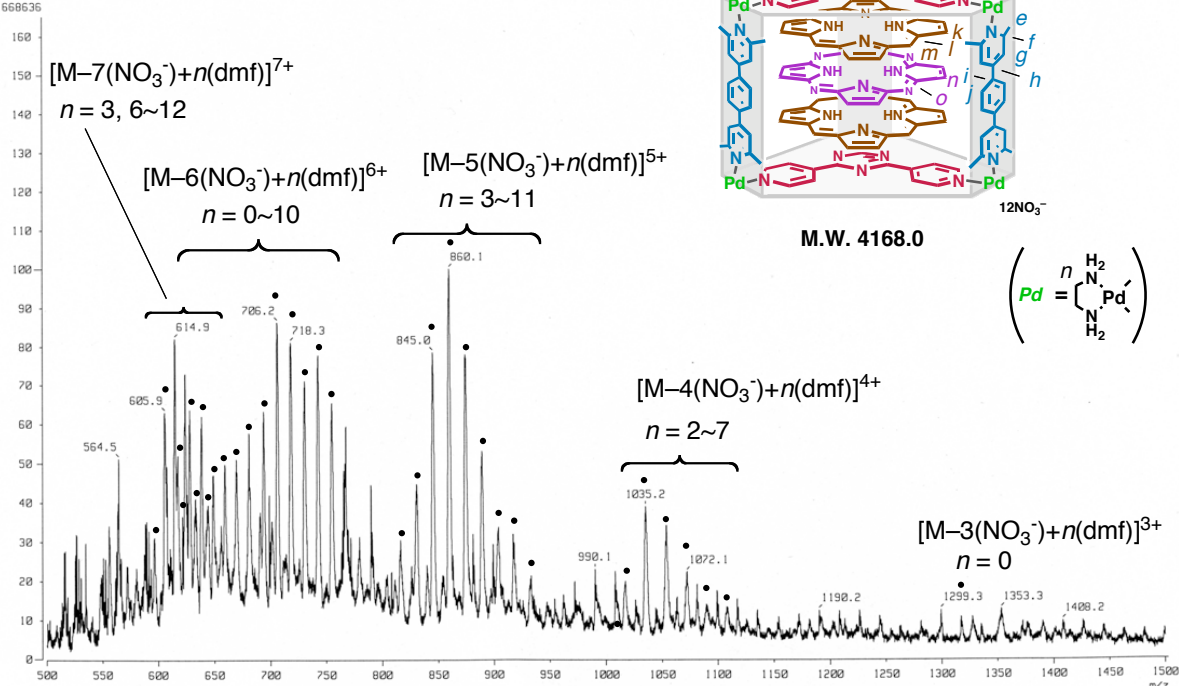

UV-vis ( $\text{H}_2\text{O}$ , r.t., 0.1 mM,  $l = 1$  mm)

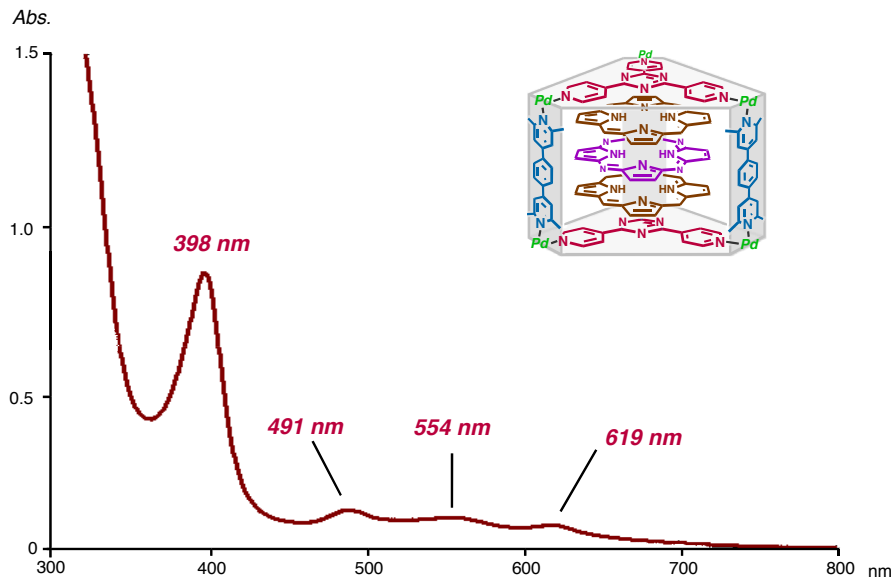

■ Physical data of **1D(5b•6c•5b)**:

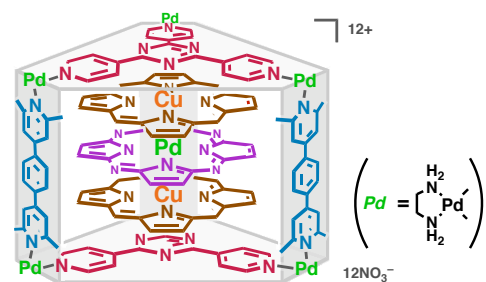

|                                       |            |        |                                                                                |        |
|---------------------------------------|------------|--------|--------------------------------------------------------------------------------|--------|
| CSI-MS (H <sub>2</sub> O:DMF = 20:1): | <i>m/z</i> | 4395.5 | [ <b>1D(5b•6c•5b)</b> –3•NO <sub>3</sub> <sup>–</sup> +DMF] <sup>3+</sup> ,    | 1427.5 |
|                                       |            |        | [ <b>1D(5b•6c•5b)</b> –3•NO <sub>3</sub> <sup>–</sup> +2•DMF] <sup>3+</sup> ,  | 1452.4 |
|                                       |            |        | [ <b>1D(5b•6c•5b)</b> –3•NO <sub>3</sub> <sup>–</sup> +3•DMF] <sup>3+</sup> ,  | 1475.6 |
|                                       |            |        | [ <b>1D(5b•6c•5b)</b> –3•NO <sub>3</sub> <sup>–</sup> +4•DMF] <sup>3+</sup> ,  | 1499.8 |
|                                       |            |        | [ <b>1D(5b•6c•5b)</b> –4•NO <sub>3</sub> <sup>–</sup> +2•DMF] <sup>4+</sup> ,  | 1073.9 |
|                                       |            |        | [ <b>1D(5b•6c•5b)</b> –4•NO <sub>3</sub> <sup>–</sup> +3•DMF] <sup>4+</sup> ,  | 1092.2 |
|                                       |            |        | [ <b>1D(5b•6c•5b)</b> –4•NO <sub>3</sub> <sup>–</sup> +4•DMF] <sup>4+</sup> ,  | 1110.3 |
|                                       |            |        | [ <b>1D(5b•6c•5b)</b> –4•NO <sub>3</sub> <sup>–</sup> +5•DMF] <sup>4+</sup> ,  | 1129.2 |
|                                       |            |        | [ <b>1D(5b•6c•5b)</b> –4•NO <sub>3</sub> <sup>–</sup> +6•DMF] <sup>4+</sup> ,  | 1146.2 |
|                                       |            |        | [ <b>1D(5b•6c•5b)</b> –4•NO <sub>3</sub> <sup>–</sup> +7•DMF] <sup>4+</sup> ,  | 1163.5 |
|                                       |            |        | [ <b>1D(5b•6c•5b)</b> –4•NO <sub>3</sub> <sup>–</sup> +8•DMF] <sup>4+</sup> ,  | 1182.4 |
|                                       |            |        | [ <b>1D(5b•6c•5b)</b> –4•NO <sub>3</sub> <sup>–</sup> +9•DMF] <sup>4+</sup> ,  | 1202.1 |
|                                       |            |        | [ <b>1D(5b•6c•5b)</b> –5•NO <sub>3</sub> <sup>–</sup> ] <sup>5+</sup> ,        | 816.9  |
|                                       |            |        | [ <b>1D(5b•6c•5b)</b> –5•NO <sub>3</sub> <sup>–</sup> +4•DMF] <sup>5+</sup> ,  | 876.4  |
|                                       |            |        | [ <b>1D(5b•6c•5b)</b> –5•NO <sub>3</sub> <sup>–</sup> +5•DMF] <sup>5+</sup> ,  | 890.6  |
|                                       |            |        | [ <b>1D(5b•6c•5b)</b> –5•NO <sub>3</sub> <sup>–</sup> +6•DMF] <sup>5+</sup> ,  | 905.4  |
|                                       |            |        | [ <b>1D(5b•6c•5b)</b> –5•NO <sub>3</sub> <sup>–</sup> +7•DMF] <sup>5+</sup> ,  | 919.8  |
|                                       |            |        | [ <b>1D(5b•6c•5b)</b> –5•NO <sub>3</sub> <sup>–</sup> +8•DMF] <sup>5+</sup> ,  | 934.7  |
|                                       |            |        | [ <b>1D(5b•6c•5b)</b> –5•NO <sub>3</sub> <sup>–</sup> +9•DMF] <sup>5+</sup> ,  | 949.2  |
|                                       |            |        | [ <b>1D(5b•6c•5b)</b> –5•NO <sub>3</sub> <sup>–</sup> +10•DMF] <sup>5+</sup> , | 963.6  |
|                                       |            |        | [ <b>1D(5b•6c•5b)</b> –6•NO <sub>3</sub> <sup>–</sup> +6•DMF] <sup>6+</sup> ,  | 744.6  |
|                                       |            |        | [ <b>1D(5b•6c•5b)</b> –6•NO <sub>3</sub> <sup>–</sup> +7•DMF] <sup>6+</sup> ,  | 756.8  |
|                                       |            |        | [ <b>1D(5b•6c•5b)</b> –6•NO <sub>3</sub> <sup>–</sup> +8•DMF] <sup>6+</sup> ,  | 767.8  |
|                                       |            |        | [ <b>1D(5b•6c•5b)</b> –6•NO <sub>3</sub> <sup>–</sup> +9•DMF] <sup>6+</sup> ,  | 780.7  |
|                                       |            |        | [ <b>1D(5b•6c•5b)</b> –6•NO <sub>3</sub> <sup>–</sup> +10•DMF] <sup>6+</sup> , | 792.6  |
|                                       |            |        | [ <b>1D(5b•6c•5b)</b> –6•NO <sub>3</sub> <sup>–</sup> +11•DMF] <sup>6+</sup> , | 805.3  |
|                                       |            |        | [ <b>1D(5b•6c•5b)</b> –6•NO <sub>3</sub> <sup>–</sup> +12•DMF] <sup>6+</sup> , | 816.8  |
|                                       |            |        | [ <b>1D(5b•6c•5b)</b> –6•NO <sub>3</sub> <sup>–</sup> +13•DMF] <sup>6+</sup> , | 828.8  |
|                                       |            |        | [ <b>1D(5b•6c•5b)</b> –6•NO <sub>3</sub> <sup>–</sup> +14•DMF] <sup>6+</sup> , | 841.5  |
|                                       |            |        | [ <b>1D(5b•6c•5b)</b> –6•NO <sub>3</sub> <sup>–</sup> +15•DMF] <sup>6+</sup> , | 852.7  |
|                                       |            |        | [ <b>1D(5b•6c•5b)</b> –7•NO <sub>3</sub> <sup>–</sup> +10•DMF] <sup>7+</sup> , | 670.7  |
|                                       |            |        | [ <b>1D(5b•6c•5b)</b> –7•NO <sub>3</sub> <sup>–</sup> +11•DMF] <sup>7+</sup> , | 681.0  |
|                                       |            |        | [ <b>1D(5b•6c•5b)</b> –7•NO <sub>3</sub> <sup>–</sup> +12•DMF] <sup>7+</sup> , | 691.1  |
|                                       |            |        | [ <b>1D(5b•6c•5b)</b> –7•NO <sub>3</sub> <sup>–</sup> +13•DMF] <sup>7+</sup> , | 702.1  |
|                                       |            |        | [ <b>1D(5b•6c•5b)</b> –7•NO <sub>3</sub> <sup>–</sup> +14•DMF] <sup>7+</sup> , | 712.7  |
|                                       |            |        | [ <b>1D(5b•6c•5b)</b> –7•NO <sub>3</sub> <sup>–</sup> +15•DMF] <sup>7+</sup> , | 722.3  |
|                                       |            |        | [ <b>1D(5b•6c•5b)</b> –7•NO <sub>3</sub> <sup>–</sup> +16•DMF] <sup>7+</sup> , | 733.0  |
|                                       |            |        | [ <b>1D(5b•6c•5b)</b> –8•NO <sub>3</sub> <sup>–</sup> +16•DMF] <sup>8+</sup> , | 634.7  |
|                                       |            |        | [ <b>1D(5b•6c•5b)</b> –8•NO <sub>3</sub> <sup>–</sup> +17•DMF] <sup>8+</sup> , | 642.9  |
|                                       |            |        | [ <b>1D(5b•6c•5b)</b> –8•NO <sub>3</sub> <sup>–</sup> +18•DMF] <sup>8+</sup> , | 652.3  |
|                                       |            |        | [ <b>1D(5b•6c•5b)</b> –8•NO <sub>3</sub> <sup>–</sup> +19•DMF] <sup>8+</sup> , | 661.6  |

IR (ATR, cm<sup>–1</sup>): 3412 (br), 3206 (br), 3104 (br), 1614, 1519, 1331(br), 1152, 1057, 996, 827, 804; m.p.: ~200 °C (decomposed); UV-vis (H<sub>2</sub>O, nm): λ<sub>max</sub> 548 (ε = 1.3 × 10<sup>4</sup>), 523 (ε = 1.2 × 10<sup>4</sup>), 396 (ε = 9.5 × 10<sup>4</sup>).



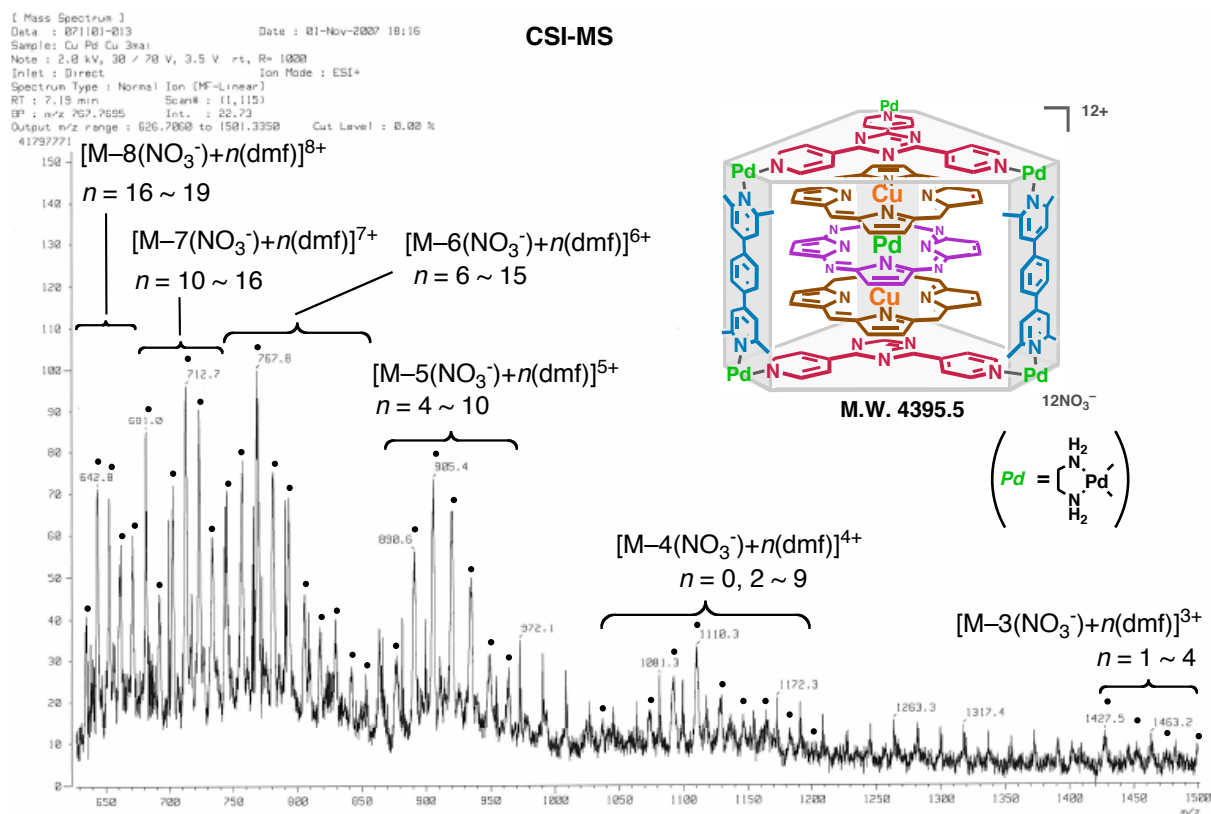

UV-vis (H<sub>2</sub>O, r.t., 0.1 mM, l = 1 mm)

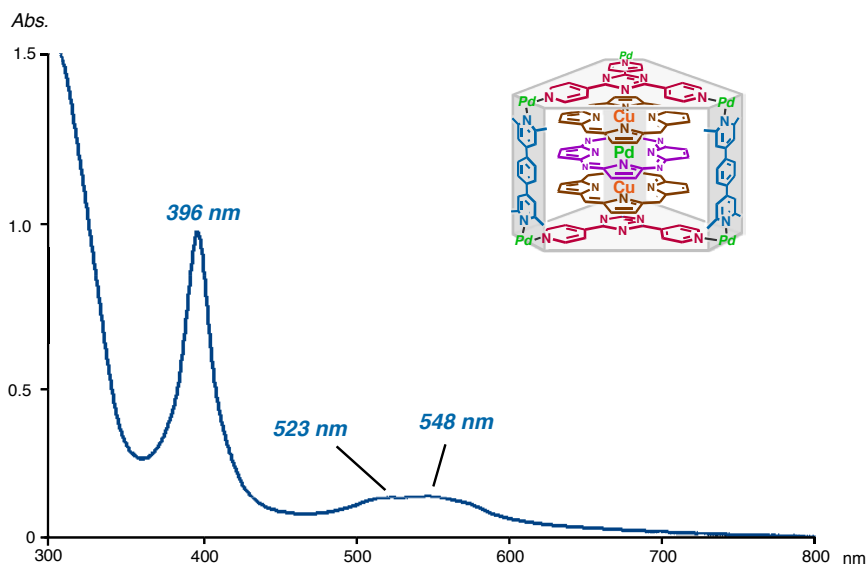

■ Physical data of **1**(**5b**•**6d**•**5b**):

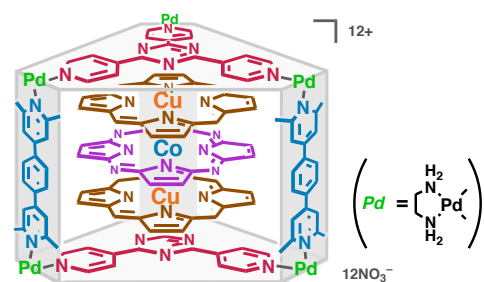

CSI-MS (H<sub>2</sub>O:DMF = 20:1): *m/z* 4348.0 [1(**5b**•**6d**•**5b**)-3•NO<sub>3</sub><sup>-</sup>+DMF]<sup>3+</sup>, 1411.2  
 [1(**5b**•**6d**•**5b**)-4•NO<sub>3</sub><sup>-</sup>+DMF]<sup>4+</sup>, 1042.4 [1(**5b**•**6d**•**5b**)-4•NO<sub>3</sub><sup>-</sup>+2•DMF]<sup>4+</sup>, 1060.8  
 [1(**5b**•**6d**•**5b**)-4•NO<sub>3</sub><sup>-</sup>+3•DMF]<sup>4+</sup>, 1079.8 [1(**5b**•**6d**•**5b**)-4•NO<sub>3</sub><sup>-</sup>+5•DMF]<sup>4+</sup>, 1115.6  
 [1(**5b**•**6d**•**5b**)-5•NO<sub>3</sub><sup>-</sup>+3•DMF]<sup>5+</sup>, 850.8 [1(**5b**•**6d**•**5b**)-5•NO<sub>3</sub><sup>-</sup>+4•DMF]<sup>5+</sup>, 865.1  
 [1(**5b**•**6d**•**5b**)-5•NO<sub>3</sub><sup>-</sup>+5•DMF]<sup>5+</sup>, 879.9 [1(**5b**•**6d**•**5b**)-5•NO<sub>3</sub><sup>-</sup>+6•DMF]<sup>5+</sup>, 894.3  
 [1(**5b**•**6d**•**5b**)-5•NO<sub>3</sub><sup>-</sup>+7•DMF]<sup>5+</sup>, 908.9 [1(**5b**•**6d**•**5b**)-6•NO<sub>3</sub><sup>-</sup>+5•DMF]<sup>6+</sup>, 724.6  
 [1(**5b**•**6d**•**5b**)-6•NO<sub>3</sub><sup>-</sup>+6•DMF]<sup>6+</sup>, 735.1 [1(**5b**•**6d**•**5b**)-6•NO<sub>3</sub><sup>-</sup>+7•DMF]<sup>6+</sup>, 746.9  
 [1(**5b**•**6d**•**5b**)-6•NO<sub>3</sub><sup>-</sup>+8•DMF]<sup>6+</sup>, 759.1 [1(**5b**•**6d**•**5b**)-6•NO<sub>3</sub><sup>-</sup>+9•DMF]<sup>6+</sup>, 771.5  
 [1(**5b**•**6d**•**5b**)-6•NO<sub>3</sub><sup>-</sup>+10•DMF]<sup>6+</sup>, 783.9 [1(**5b**•**6d**•**5b**)-6•NO<sub>3</sub><sup>-</sup>+11•DMF]<sup>6+</sup>, 795.6  
 [1(**5b**•**6d**•**5b**)-6•NO<sub>3</sub><sup>-</sup>+12•DMF]<sup>6+</sup>, 808.0 [1(**5b**•**6d**•**5b**)-7•NO<sub>3</sub><sup>-</sup>+3•DMF]<sup>7+</sup>, 590.8  
 [1(**5b**•**6d**•**5b**)-7•NO<sub>3</sub><sup>-</sup>+4•DMF]<sup>7+</sup>, 599.4 [1(**5b**•**6d**•**5b**)-7•NO<sub>3</sub><sup>-</sup>+8•DMF]<sup>7+</sup>, 642.1  
 [1(**5b**•**6d**•**5b**)-7•NO<sub>3</sub><sup>-</sup>+9•DMF]<sup>7+</sup>, 652.4 [1(**5b**•**6d**•**5b**)-7•NO<sub>3</sub><sup>-</sup>+10•DMF]<sup>7+</sup>, 662.8  
 [1(**5b**•**6d**•**5b**)-7•NO<sub>3</sub><sup>-</sup>+11•DMF]<sup>7+</sup>, 674.2 [1(**5b**•**6d**•**5b**)-7•NO<sub>3</sub><sup>-</sup>+12•DMF]<sup>7+</sup>, 683.9  
 [1(**5b**•**6d**•**5b**)-7•NO<sub>3</sub><sup>-</sup>+13•DMF]<sup>7+</sup>, 693.8 [1(**5b**•**6d**•**5b**)-7•NO<sub>3</sub><sup>-</sup>+15•DMF]<sup>7+</sup>, 715.1  
 [1(**5b**•**6d**•**5b**)-8•NO<sub>3</sub><sup>-</sup>+9•DMF]<sup>8+</sup>, 563.9; IR (ATR, cm<sup>-1</sup>): 3425 (br), 3211 (br), 3108 (br),  
 1613, 1524, 1519, 1331(br), 1153, 1059, 994; m.p.: ~200 °C (decomposed); UV-vis (H<sub>2</sub>O,  
 nm): λ<sub>max</sub> 547 (ε = 1.1 × 10<sup>4</sup>), 521 (ε = 1.2 × 10<sup>4</sup>), 395 (ε = 9.8 × 10<sup>4</sup>).

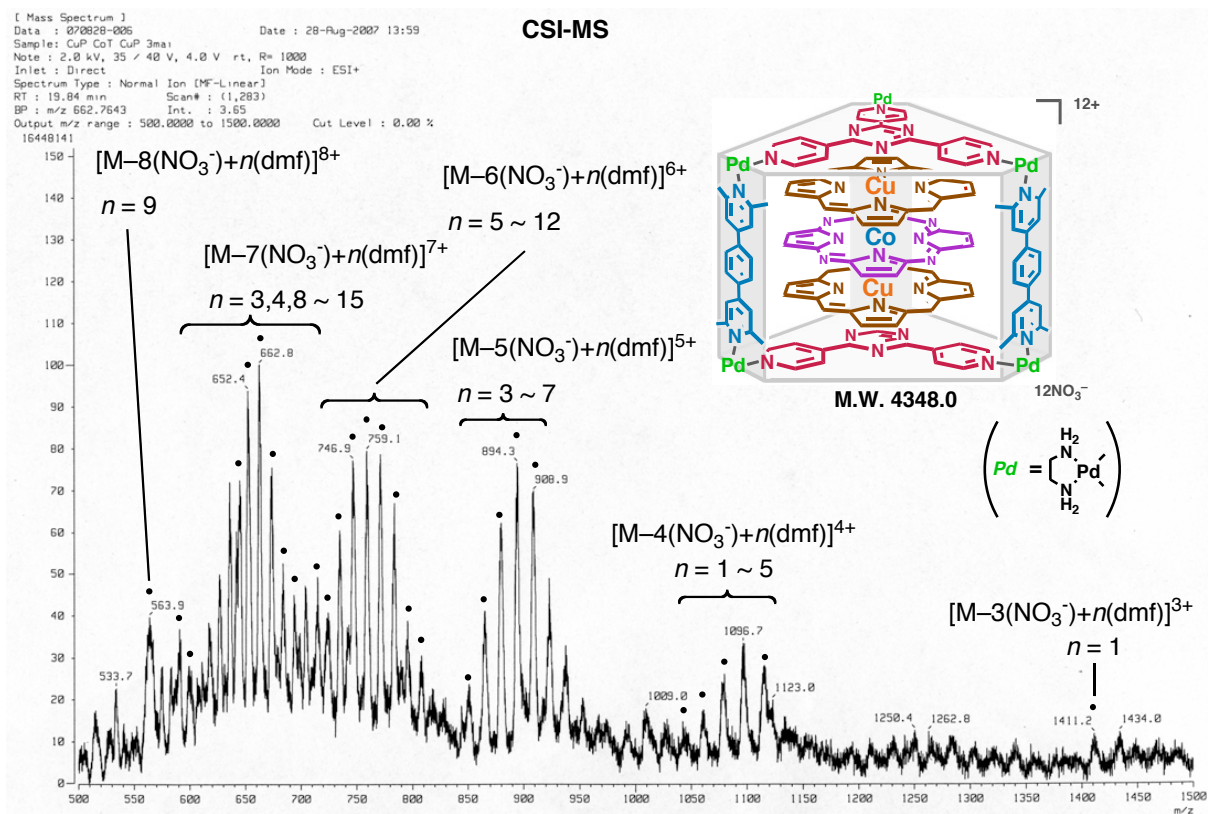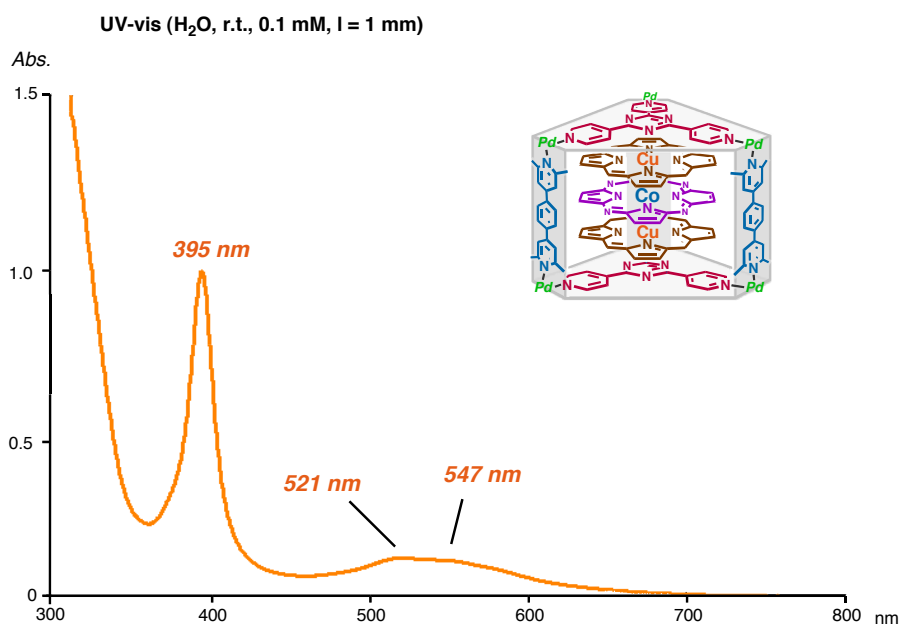

■ Physical data of **1**(**5b**•**6a**•**5b**):

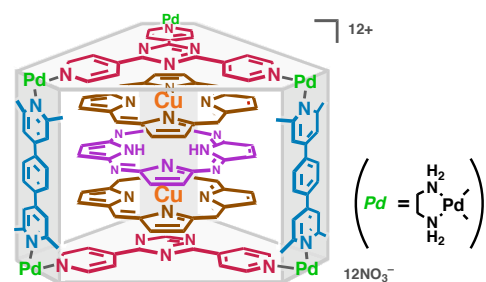

|                                       |                   |                                                                                                                                                                |        |
|---------------------------------------|-------------------|----------------------------------------------------------------------------------------------------------------------------------------------------------------|--------|
| CSI-MS (H <sub>2</sub> O:DMF = 20:1): | <i>m/z</i> 4291.1 | [ <b>1</b> ( <b>5b</b> • <b>6a</b> • <b>5b</b> )–3•NO <sub>3</sub> <sup>–</sup> +DMF] <sup>3+</sup> ,                                                          | 1392.5 |
|                                       |                   | [ <b>1</b> ( <b>5b</b> • <b>6a</b> • <b>5b</b> )–3•NO <sub>3</sub> <sup>–</sup> +2•DMF] <sup>3+</sup> ,                                                        | 1417.3 |
|                                       |                   | [ <b>1</b> ( <b>5b</b> • <b>6a</b> • <b>5b</b> )–3•NO <sub>3</sub> <sup>–</sup> +3•DMF] <sup>3+</sup> ,                                                        | 1442.5 |
|                                       |                   | [ <b>1</b> ( <b>5b</b> • <b>6a</b> • <b>5b</b> )–4•NO <sub>3</sub> <sup>–</sup> +DMF] <sup>4+</sup> ,                                                          | 1030.0 |
|                                       |                   | [ <b>1</b> ( <b>5b</b> • <b>6a</b> • <b>5b</b> )–4•NO <sub>3</sub> <sup>–</sup> +2•DMF] <sup>4+</sup> ,                                                        | 1047.8 |
|                                       |                   | [ <b>1</b> ( <b>5b</b> • <b>6a</b> • <b>5b</b> )–4•NO <sub>3</sub> <sup>–</sup> +3•DMF] <sup>4+</sup> ,                                                        | 1066.1 |
|                                       |                   | [ <b>1</b> ( <b>5b</b> • <b>6a</b> • <b>5b</b> )–4•NO <sub>3</sub> <sup>–</sup> +4•DMF] <sup>4+</sup> ,                                                        | 1084.8 |
|                                       |                   | [ <b>1</b> ( <b>5b</b> • <b>6a</b> • <b>5b</b> )–4•NO <sub>3</sub> <sup>–</sup> +5•DMF] <sup>4+</sup> ,                                                        | 1102.9 |
|                                       |                   | [ <b>1</b> ( <b>5b</b> • <b>6a</b> • <b>5b</b> )–4•NO <sub>3</sub> <sup>–</sup> +6•DMF] <sup>4+</sup> ,                                                        | 1120.8 |
|                                       |                   | [ <b>1</b> ( <b>5b</b> • <b>6a</b> • <b>5b</b> )–4•NO <sub>3</sub> <sup>–</sup> +7•DMF] <sup>4+</sup> ,                                                        | 1138.2 |
|                                       |                   | [ <b>1</b> ( <b>5b</b> • <b>6a</b> • <b>5b</b> )–4•NO <sub>3</sub> <sup>–</sup> +8•DMF] <sup>4+</sup> ,                                                        | 1156.3 |
|                                       |                   | [ <b>1</b> ( <b>5b</b> • <b>6a</b> • <b>5b</b> )–4•NO <sub>3</sub> <sup>–</sup> +9•DMF] <sup>4+</sup> ,                                                        | 1172.3 |
|                                       |                   | [ <b>1</b> ( <b>5b</b> • <b>6a</b> • <b>5b</b> )–4•NO <sub>3</sub> <sup>–</sup> +10•DMF] <sup>4+</sup> ,                                                       | 1193.1 |
|                                       |                   | [ <b>1</b> ( <b>5b</b> • <b>6a</b> • <b>5b</b> )–5•NO <sub>3</sub> <sup>–</sup> +4•DMF] <sup>5+</sup> ,                                                        | 855.6  |
|                                       |                   | [ <b>1</b> ( <b>5b</b> • <b>6a</b> • <b>5b</b> )–5•NO <sub>3</sub> <sup>–</sup> +5•DMF] <sup>5+</sup> ,                                                        | 870.1  |
|                                       |                   | [ <b>1</b> ( <b>5b</b> • <b>6a</b> • <b>5b</b> )–5•NO <sub>3</sub> <sup>–</sup> +6•DMF] <sup>5+</sup> ,                                                        | 884.6  |
|                                       |                   | [ <b>1</b> ( <b>5b</b> • <b>6a</b> • <b>5b</b> )–5•NO <sub>3</sub> <sup>–</sup> +7•DMF] <sup>5+</sup> ,                                                        | 899.0  |
|                                       |                   | [ <b>1</b> ( <b>5b</b> • <b>6a</b> • <b>5b</b> )–5•NO <sub>3</sub> <sup>–</sup> +8•DMF] <sup>5+</sup> ,                                                        | 913.5  |
|                                       |                   | [ <b>1</b> ( <b>5b</b> • <b>6a</b> • <b>5b</b> )–5•NO <sub>3</sub> <sup>–</sup> +9•DMF] <sup>5+</sup> ,                                                        | 928.0  |
|                                       |                   | [ <b>1</b> ( <b>5b</b> • <b>6a</b> • <b>5b</b> )–5•NO <sub>3</sub> <sup>–</sup> +10•DMF] <sup>5+</sup> ,                                                       | 942.3  |
|                                       |                   | [ <b>1</b> ( <b>5b</b> • <b>6a</b> • <b>5b</b> )–5•NO <sub>3</sub> <sup>–</sup> +11•DMF] <sup>5+</sup> ,                                                       | 957.2  |
|                                       |                   | [ <b>1</b> ( <b>5b</b> • <b>6a</b> • <b>5b</b> )–5•NO <sub>3</sub> <sup>–</sup> +12•DMF] <sup>5+</sup> ,                                                       | 972.2  |
|                                       |                   | [ <b>1</b> ( <b>5b</b> • <b>6a</b> • <b>5b</b> )–6•NO <sub>3</sub> <sup>–</sup> +6•DMF] <sup>6+</sup> ,                                                        | 726.9  |
|                                       |                   | [ <b>1</b> ( <b>5b</b> • <b>6a</b> • <b>5b</b> )–6•NO <sub>3</sub> <sup>–</sup> +7•DMF] <sup>6+</sup> ,                                                        | 739.3  |
|                                       |                   | [ <b>1</b> ( <b>5b</b> • <b>6a</b> • <b>5b</b> )–6•NO <sub>3</sub> <sup>–</sup> +8•DMF] <sup>6+</sup> ,                                                        | 751.0  |
|                                       |                   | [ <b>1</b> ( <b>5b</b> • <b>6a</b> • <b>5b</b> )–6•NO <sub>3</sub> <sup>–</sup> +9•DMF] <sup>6+</sup> ,                                                        | 763.3  |
|                                       |                   | [ <b>1</b> ( <b>5b</b> • <b>6a</b> • <b>5b</b> )–6•NO <sub>3</sub> <sup>–</sup> +10•DMF] <sup>6+</sup> ,                                                       | 775.2  |
|                                       |                   | [ <b>1</b> ( <b>5b</b> • <b>6a</b> • <b>5b</b> )–6•NO <sub>3</sub> <sup>–</sup> +11•DMF] <sup>6+</sup> ,                                                       | 787.7  |
|                                       |                   | [ <b>1</b> ( <b>5b</b> • <b>6a</b> • <b>5b</b> )–6•NO <sub>3</sub> <sup>–</sup> +12•DMF] <sup>6+</sup> ,                                                       | 799.9  |
|                                       |                   | [ <b>1</b> ( <b>5b</b> • <b>6a</b> • <b>5b</b> )–6•NO <sub>3</sub> <sup>–</sup> +13•DMF] <sup>6+</sup> ,                                                       | 812.1  |
|                                       |                   | [ <b>1</b> ( <b>5b</b> • <b>6a</b> • <b>5b</b> )–7•NO <sub>3</sub> <sup>–</sup> +8•DMF] <sup>7+</sup> ,                                                        | 634.8  |
|                                       |                   | [ <b>1</b> ( <b>5b</b> • <b>6a</b> • <b>5b</b> )–7•NO <sub>3</sub> <sup>–</sup> +9•DMF] <sup>7+</sup> ,                                                        | 645.6  |
|                                       |                   | [ <b>1</b> ( <b>5b</b> • <b>6a</b> • <b>5b</b> )–7•NO <sub>3</sub> <sup>–</sup> +10•DMF] <sup>7+</sup> ,                                                       | 656.0  |
|                                       |                   | [ <b>1</b> ( <b>5b</b> • <b>6a</b> • <b>5b</b> )–7•NO <sub>3</sub> <sup>–</sup> +11•DMF] <sup>7+</sup> ,                                                       | 666.5  |
|                                       |                   | [ <b>1</b> ( <b>5b</b> • <b>6a</b> • <b>5b</b> )–7•NO <sub>3</sub> <sup>–</sup> +12•DMF] <sup>7+</sup> ,                                                       | 676.9  |
|                                       |                   | [ <b>1</b> ( <b>5b</b> • <b>6a</b> • <b>5b</b> )–7•NO <sub>3</sub> <sup>–</sup> +13•DMF] <sup>7+</sup> ,                                                       | 687.3  |
|                                       |                   | [ <b>1</b> ( <b>5b</b> • <b>6a</b> • <b>5b</b> )–7•NO <sub>3</sub> <sup>–</sup> +14•DMF] <sup>7+</sup> ,                                                       | 697.5  |
|                                       |                   | [ <b>1</b> ( <b>5b</b> • <b>6a</b> • <b>5b</b> )–8•NO <sub>3</sub> <sup>–</sup> +13•DMF] <sup>8+</sup> ,                                                       | 593.8  |
|                                       |                   | [ <b>1</b> ( <b>5b</b> • <b>6a</b> • <b>5b</b> )–8•NO <sub>3</sub> <sup>–</sup> +14•DMF] <sup>8+</sup> ,                                                       | 602.8  |
|                                       |                   | [ <b>1</b> ( <b>5b</b> • <b>6a</b> • <b>5b</b> )–8•NO <sub>3</sub> <sup>–</sup> +16•DMF] <sup>8+</sup> ,                                                       | 621.0  |
|                                       |                   | [ <b>1</b> ( <b>5b</b> • <b>6a</b> • <b>5b</b> )–8•NO <sub>3</sub> <sup>–</sup> +17•DMF] <sup>8+</sup> ,                                                       | 630.0  |
|                                       |                   | [ <b>1</b> ( <b>5b</b> • <b>6a</b> • <b>5b</b> )–8•NO <sub>3</sub> <sup>–</sup> +18•DMF] <sup>8+</sup> ,                                                       | 639.3  |
|                                       |                   | [ <b>1</b> ( <b>5b</b> • <b>6a</b> • <b>5b</b> )–8•NO <sub>3</sub> <sup>–</sup> +18•DMF] <sup>8+</sup> ,                                                       | 647.8; |
|                                       |                   | IR (ATR, cm <sup>–1</sup> ): 3406 (br), 3204 (br), 3102 (br),                                                                                                  |        |
|                                       |                   | 1614, 1519, 1454, 1327(br), 1152, 1057, 995, 937, 827, 805; m.p.: ~200 °C (decomposed);                                                                        |        |
|                                       |                   | UV-vis (H <sub>2</sub> O, nm): λ <sub>max</sub> 621 (ε = 7.8 × 10 <sup>3</sup> ), 548 (ε = 1.2 × 10 <sup>4</sup> ), 516 (ε = 1.2 × 10 <sup>4</sup> ), 394 (ε = |        |
|                                       |                   | 8.4 × 10 <sup>4</sup> ).                                                                                                                                       |        |

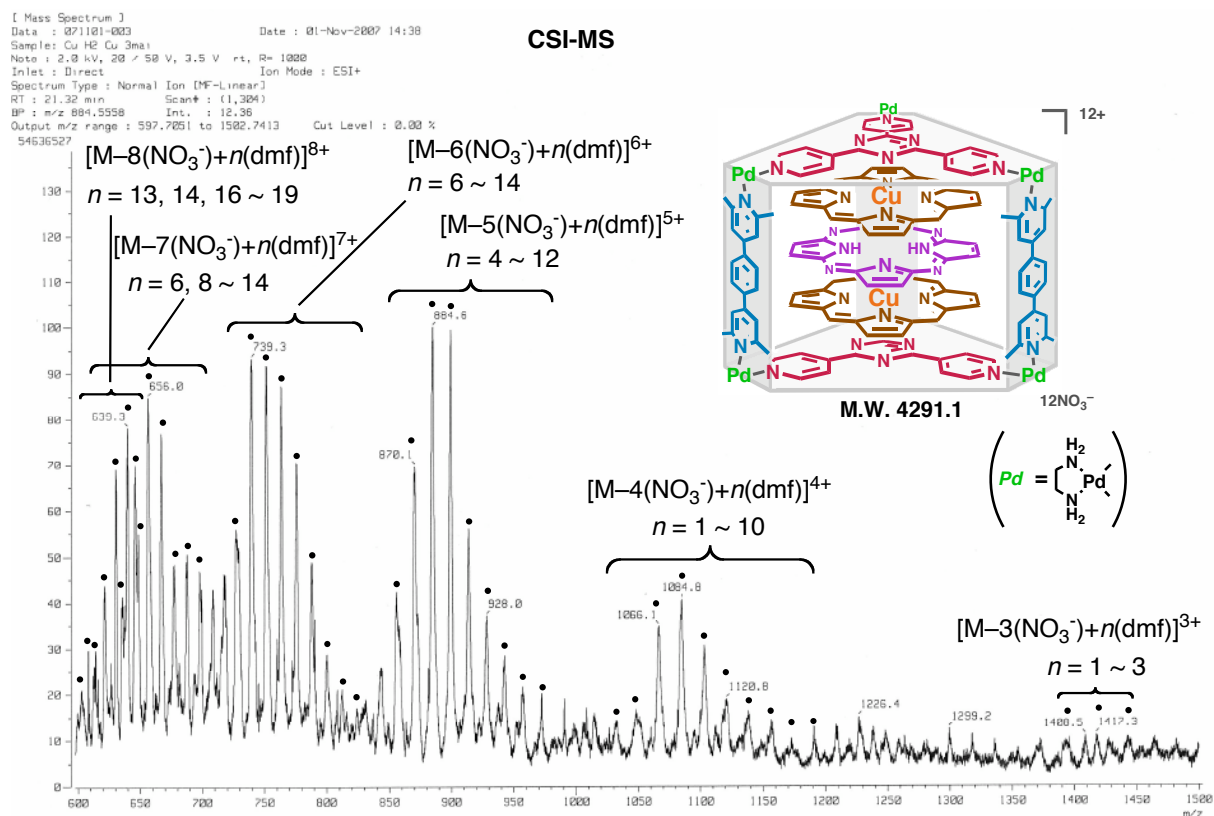

UV-vis ( $\text{H}_2\text{O}$ , r.t., 0.1mM, l = 1 mm)

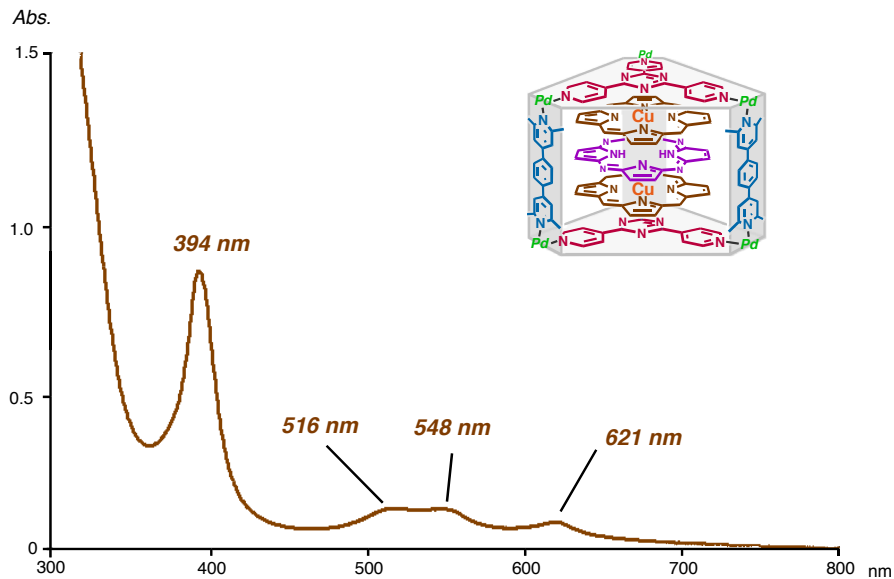

■ Physical data of **1**(**5a**•**6d**•**5a**):

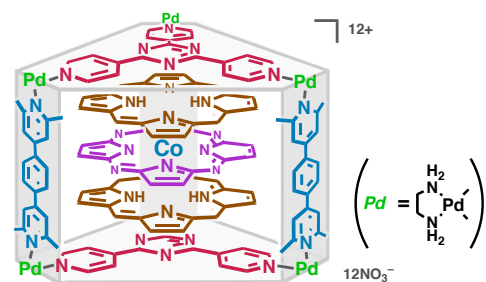

|                                                                                                         |            |                                                                                                         |                                                                                                   |        |
|---------------------------------------------------------------------------------------------------------|------------|---------------------------------------------------------------------------------------------------------|---------------------------------------------------------------------------------------------------|--------|
| CSI-MS (H <sub>2</sub> O:DMF = 20:1):                                                                   | <i>m/z</i> | 4224.9                                                                                                  | [ <b>1</b> ( <b>5a</b> • <b>6d</b> • <b>5a</b> )–3•NO <sub>3</sub> <sup>–</sup> ] <sup>3+</sup> , | 1346.4 |
| [ <b>1</b> ( <b>5a</b> • <b>6d</b> • <b>5a</b> )–3•NO <sub>3</sub> <sup>–</sup> +DMF] <sup>3+</sup> ,   | 1371.5     | [ <b>1</b> ( <b>5a</b> • <b>6d</b> • <b>5a</b> )–4•NO <sub>3</sub> <sup>–</sup> +DMF] <sup>4+</sup> ,   | 1013.2                                                                                            |        |
| [ <b>1</b> ( <b>5a</b> • <b>6d</b> • <b>5a</b> )–4•NO <sub>3</sub> <sup>–</sup> +2•DMF] <sup>4+</sup> , | 1031.3     | [ <b>1</b> ( <b>5a</b> • <b>6d</b> • <b>5a</b> )–4•NO <sub>3</sub> <sup>–</sup> +3•DMF] <sup>4+</sup> , | 1049.0                                                                                            |        |
| [ <b>1</b> ( <b>5a</b> • <b>6d</b> • <b>5a</b> )–4•NO <sub>3</sub> <sup>–</sup> +4•DMF] <sup>4+</sup> , | 1067.2     | [ <b>1</b> ( <b>5a</b> • <b>6d</b> • <b>5a</b> )–4•NO <sub>3</sub> <sup>–</sup> +5•DMF] <sup>4+</sup> , | 1085.9                                                                                            |        |
| [ <b>1</b> ( <b>5a</b> • <b>6d</b> • <b>5a</b> )–4•NO <sub>3</sub> <sup>–</sup> +6•DMF] <sup>4+</sup> , | 1104.6     | [ <b>1</b> ( <b>5a</b> • <b>6d</b> • <b>5a</b> )–4•NO <sub>3</sub> <sup>–</sup> +7•DMF] <sup>4+</sup> , | 1122.1                                                                                            |        |
| [ <b>1</b> ( <b>5a</b> • <b>6d</b> • <b>5a</b> )–4•NO <sub>3</sub> <sup>–</sup> +8•DMF] <sup>4+</sup> , | 1141.2     | [ <b>1</b> ( <b>5a</b> • <b>6d</b> • <b>5a</b> )–5•NO <sub>3</sub> <sup>–</sup> +2•DMF] <sup>5+</sup> , | 813.1                                                                                             |        |
| [ <b>1</b> ( <b>5a</b> • <b>6d</b> • <b>5a</b> )–5•NO <sub>3</sub> <sup>–</sup> +3•DMF] <sup>5+</sup> , | 826.4      | [ <b>1</b> ( <b>5a</b> • <b>6d</b> • <b>5a</b> )–5•NO <sub>3</sub> <sup>–</sup> +4•DMF] <sup>5+</sup> , | 841.7                                                                                             |        |
| [ <b>1</b> ( <b>5a</b> • <b>6d</b> • <b>5a</b> )–5•NO <sub>3</sub> <sup>–</sup> +5•DMF] <sup>5+</sup> , | 856.3      | [ <b>1</b> ( <b>5a</b> • <b>6d</b> • <b>5a</b> )–5•NO <sub>3</sub> <sup>–</sup> +6•DMF] <sup>5+</sup> , | 871.2                                                                                             |        |
| [ <b>1</b> ( <b>5a</b> • <b>6d</b> • <b>5a</b> )–5•NO <sub>3</sub> <sup>–</sup> +7•DMF] <sup>5+</sup> , | 885.7      | [ <b>1</b> ( <b>5a</b> • <b>6d</b> • <b>5a</b> )–5•NO <sub>3</sub> <sup>–</sup> +8•DMF] <sup>5+</sup> , | 900.0                                                                                             |        |
| [ <b>1</b> ( <b>5a</b> • <b>6d</b> • <b>5a</b> )–6•NO <sub>3</sub> <sup>–</sup> ] <sup>6+</sup> ,       | 641.3      | [ <b>1</b> ( <b>5a</b> • <b>6d</b> • <b>5a</b> )–6•NO <sub>3</sub> <sup>–</sup> +DMF] <sup>6+</sup> ,   | 653.6                                                                                             |        |
| [ <b>1</b> ( <b>5a</b> • <b>6d</b> • <b>5a</b> )–6•NO <sub>3</sub> <sup>–</sup> +2•DMF] <sup>6+</sup> , | 665.5      | [ <b>1</b> ( <b>5a</b> • <b>6d</b> • <b>5a</b> )–6•NO <sub>3</sub> <sup>–</sup> +3•DMF] <sup>6+</sup> , | 677.7                                                                                             |        |
| [ <b>1</b> ( <b>5a</b> • <b>6d</b> • <b>5a</b> )–6•NO <sub>3</sub> <sup>–</sup> +4•DMF] <sup>6+</sup> , | 691.1      | [ <b>1</b> ( <b>5a</b> • <b>6d</b> • <b>5a</b> )–6•NO <sub>3</sub> <sup>–</sup> +5•DMF] <sup>6+</sup> , | 703.3                                                                                             |        |
| [ <b>1</b> ( <b>5a</b> • <b>6d</b> • <b>5a</b> )–6•NO <sub>3</sub> <sup>–</sup> +6•DMF] <sup>6+</sup> , | 715.6      | [ <b>1</b> ( <b>5a</b> • <b>6d</b> • <b>5a</b> )–6•NO <sub>3</sub> <sup>–</sup> +7•DMF] <sup>6+</sup> , | 727.5                                                                                             |        |
| [ <b>1</b> ( <b>5a</b> • <b>6d</b> • <b>5a</b> )–6•NO <sub>3</sub> <sup>–</sup> +8•DMF] <sup>6+</sup> , | 739.9      | [ <b>1</b> ( <b>5a</b> • <b>6d</b> • <b>5a</b> )–6•NO <sub>3</sub> <sup>–</sup> +9•DMF] <sup>6+</sup> , | 752.4                                                                                             |        |
| [ <b>1</b> ( <b>5a</b> • <b>6d</b> • <b>5a</b> )–7•NO <sub>3</sub> <sup>–</sup> +6•DMF] <sup>7+</sup> , | 603.8      | [ <b>1</b> ( <b>5a</b> • <b>6d</b> • <b>5a</b> )–7•NO <sub>3</sub> <sup>–</sup> +8•DMF] <sup>7+</sup> , | 625.7                                                                                             |        |
| [ <b>1</b> ( <b>5a</b> • <b>6d</b> • <b>5a</b> )–8•NO <sub>3</sub> <sup>–</sup> +8•DMF] <sup>8+</sup> , | 539.8      | [ <b>1</b> ( <b>5a</b> • <b>6d</b> • <b>5a</b> )–8•NO <sub>3</sub> <sup>–</sup> +9•DMF] <sup>8+</sup> , | 547.6;                                                                                            |        |

IR (ATR, cm<sup>–1</sup>): 3413 (br), 3201 (br), 3098 (br), 1659, 1613, 1514, 1329(br), 1137, 1055, 989, 951;  
 m.p.: ~200 °C (decomposed); UV-vis (H<sub>2</sub>O, nm): λ<sub>max</sub> 565 (ε = 7.8 × 10<sup>3</sup>), 491 (ε = 9.9 × 10<sup>3</sup>),  
 398 (ε = 9.5 × 10<sup>4</sup>).

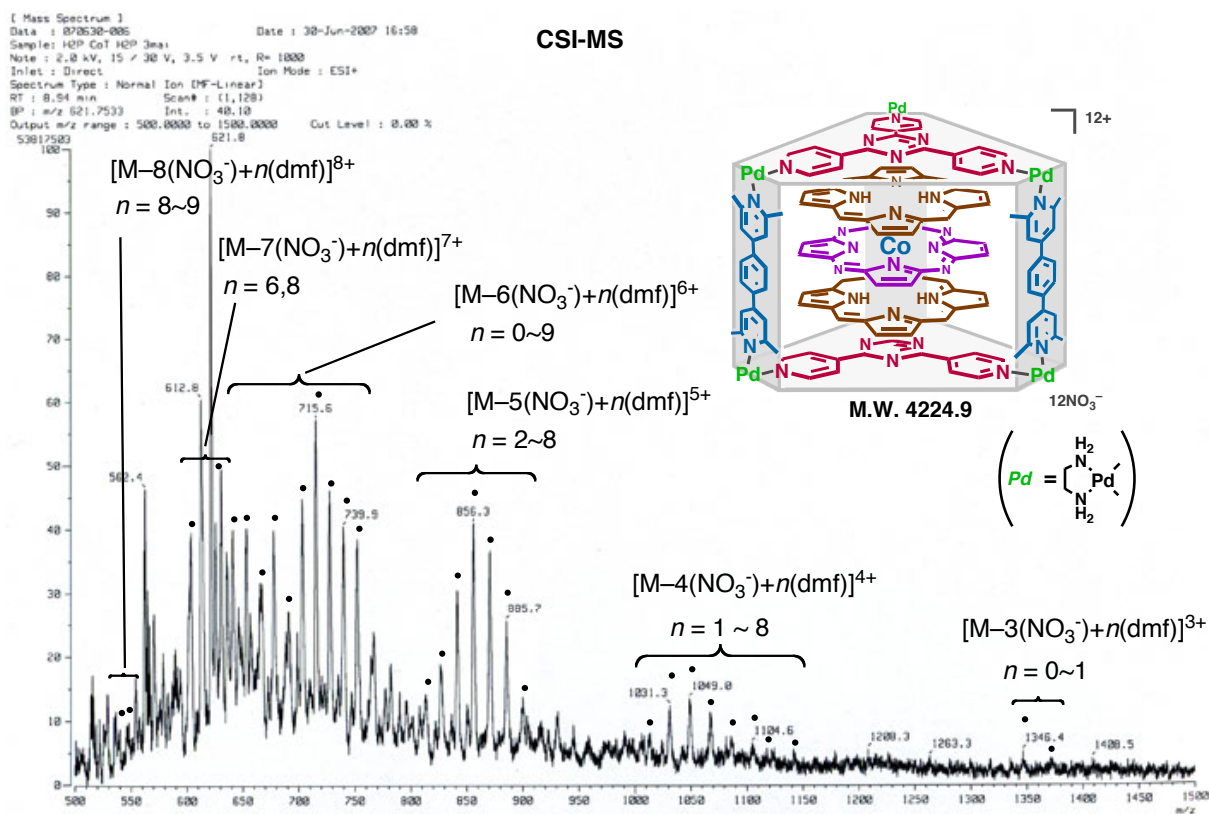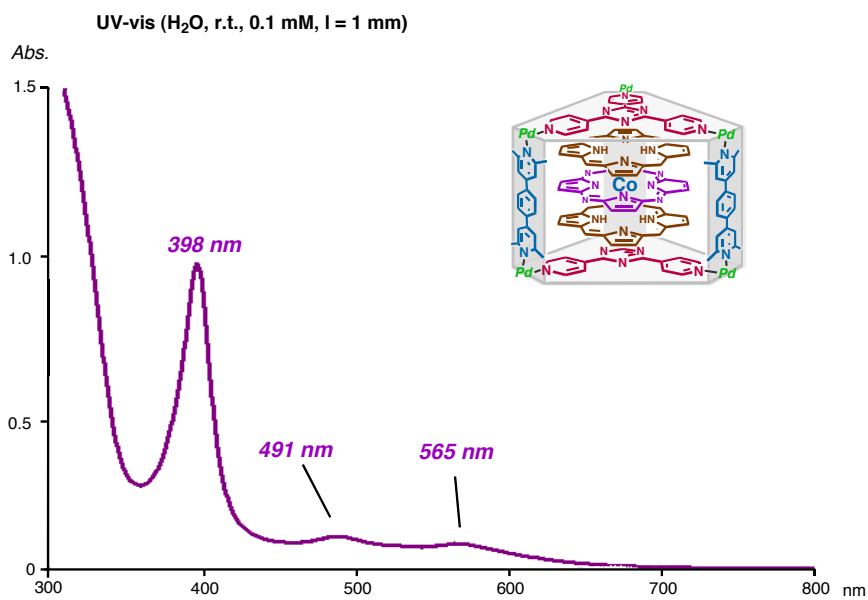

■ ESR data of  $1\text{D}(\mathbf{6b})_3$  (113 K):

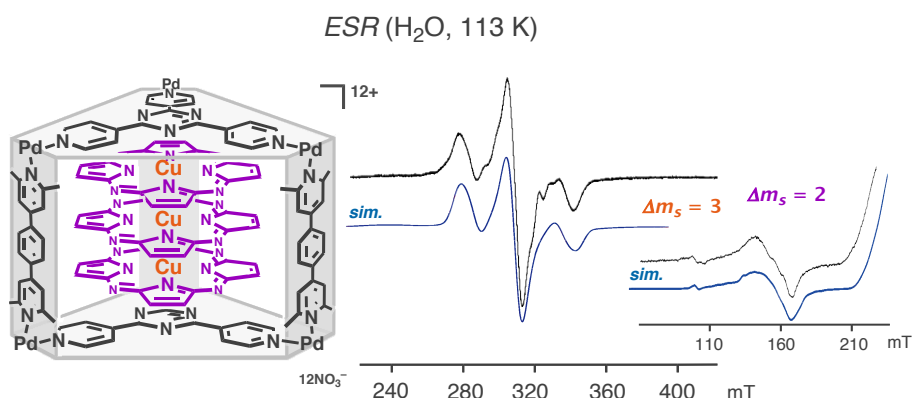

The observed spectrum is reproduced by the simulation using the following parameters. Spin quantum number:  $S = 3/2$ ,  $g$  tensor:  $g = (2.01, 2.01, 2.147)$ , hyperfine coupling tensor of Cu nuclear spin:  $A_{\text{Cu}} = (1.03, 1.03, 7.17) / \text{mT}$ , spin-spin dipole interaction parameters :  $D = 27.3 / \text{mT}$ ,  $E = 1.5 / \text{mT}$ .

■ ESR spectrum of  $1\text{D}(\mathbf{5b}\cdot\mathbf{6c}\cdot\mathbf{5b})$  (113 K, SW = 100 mT):

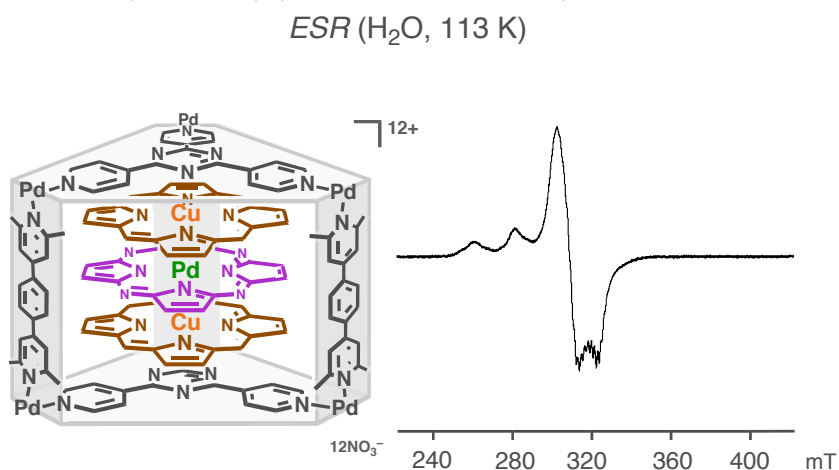

■ ESR spectrum of  $1\text{D}(\mathbf{5b}\cdot\mathbf{6d}\cdot\mathbf{5b})$  (113 K, SW = 250 mT):

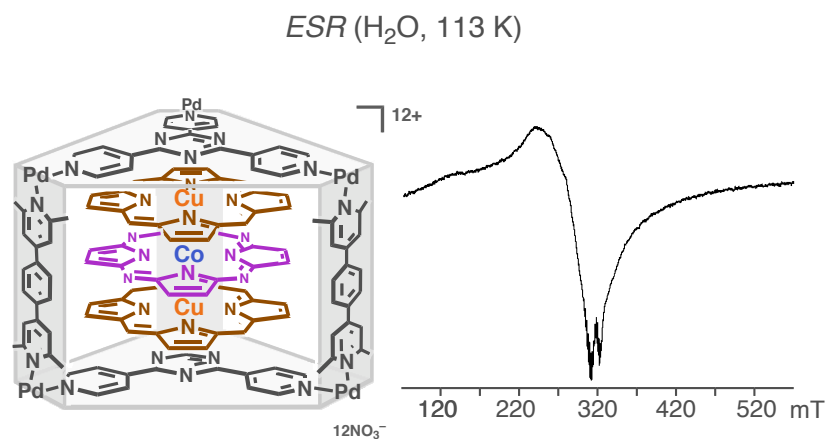



■ ESR spectrum of  $12\text{D}(\mathbf{5b}\cdot\mathbf{6a}\cdot\mathbf{5b})$  (113 K, SW = 100 mT)

*ESR* ( $\text{H}_2\text{O}$ , 113 K)

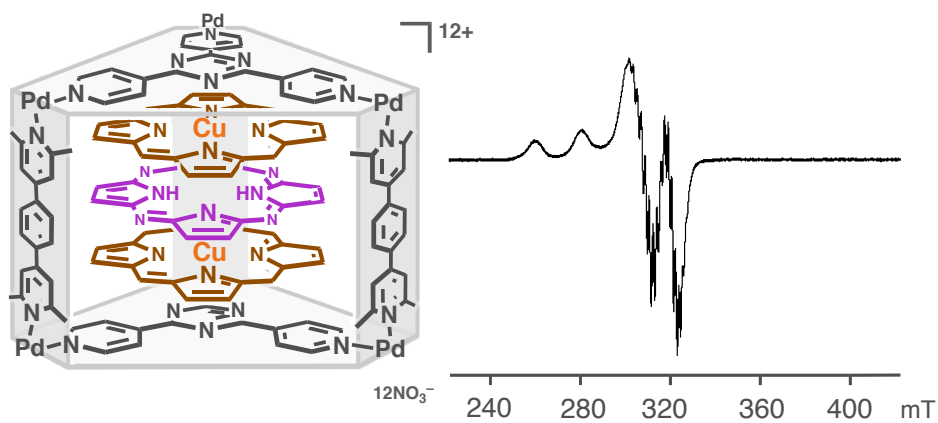

■ ESR spectrum of  $12\text{D}(\mathbf{5a}\cdot\mathbf{6d}\cdot\mathbf{5a})$  (113 K, SW = 250 mT)

*ESR* ( $\text{H}_2\text{O}$ , 113 K)

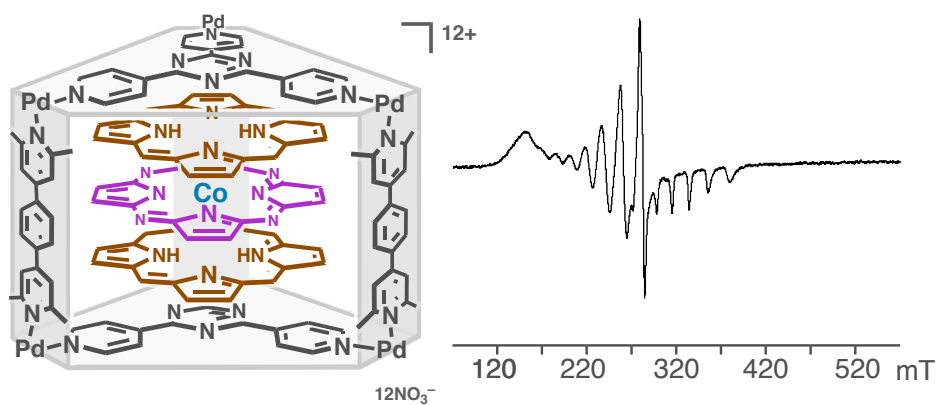

**Table S1.** Crystal data and structure refinement for **1'**⊃(**6a**)<sub>3</sub>.

|                                   |                                             |                             |
|-----------------------------------|---------------------------------------------|-----------------------------|
| Identification code               | 3p-1                                        |                             |
| Empirical formula                 | C168 H186 N64.75 O104.5 Pd6                 |                             |
| Formula weight                    | 5404.12                                     |                             |
| Temperature                       | 80(2) K                                     |                             |
| Wavelength                        | 0.71073 Å                                   |                             |
| Crystal system                    | Triclinic                                   |                             |
| Space group                       | P-1                                         |                             |
| Unit cell dimensions              | $a = 20.025(3)$ Å                           | $\alpha = 107.593(2)^\circ$ |
|                                   | $b = 26.094(4)$ Å                           | $\beta = 102.779(2)^\circ$  |
|                                   | $c = 26.215(4)$ Å                           | $\gamma = 95.762(2)^\circ$  |
| Volume                            | 12526(3) Å <sup>3</sup>                     |                             |
| Z                                 | 2                                           |                             |
| Density (calculated)              | 1.438 Mg/m <sup>3</sup>                     |                             |
| Absorption coefficient            | 0.525 mm <sup>-1</sup>                      |                             |
| F(000)                            | 5519                                        |                             |
| Crystal size                      | 0.20 x 0.10 x 0.10 mm <sup>3</sup>          |                             |
| Theta range for data collection   | 1.95 to 27.62°                              |                             |
| Index ranges                      | -26 ≤ h ≤ 25, -32 ≤ k ≤ 30, -31 ≤ l ≤ 32    |                             |
| Reflections collected             | 99554                                       |                             |
| Independent reflections           | 50850 [R(int) = 0.0302]                     |                             |
| Completeness to theta = 27.62°    | 87.3 %                                      |                             |
| Absorption correction             | None                                        |                             |
| Refinement method                 | Full-matrix least-squares on F <sup>2</sup> |                             |
| Data / restraints / parameters    | 50850 / 1141 / 3085                         |                             |
| Goodness-of-fit on F <sup>2</sup> | 1.023                                       |                             |
| Final R indices [I > 2σ(I)]       | R1 = 0.0752, wR2 = 0.2028                   |                             |
| R indices (all data)              | R1 = 0.1319, wR2 = 0.2556                   |                             |
| Largest diff. peak and hole       | 1.762 and -0.995 e.Å <sup>-3</sup>          |                             |
| CCDC No.                          | 666139                                      |                             |

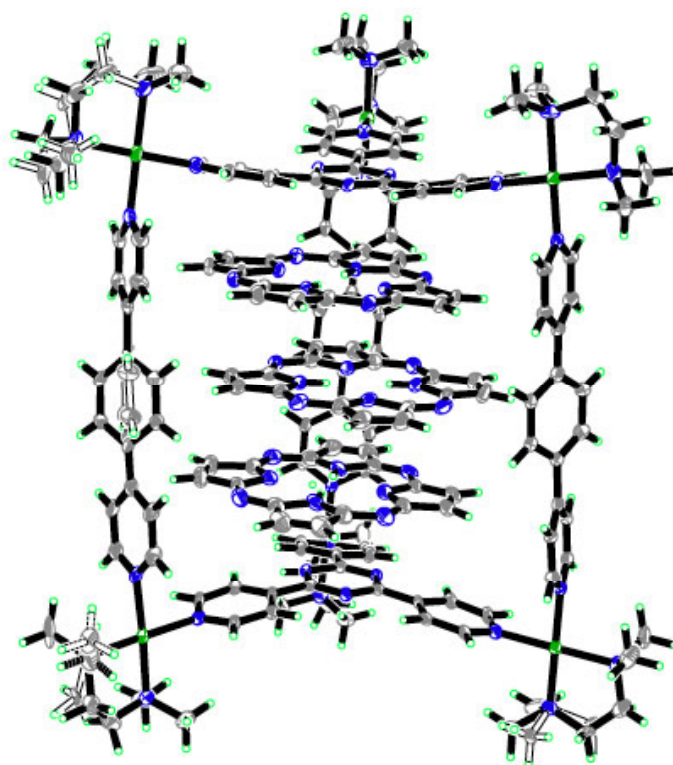

**Figure S2.** ORTEP drawing (30% probability ellipsoids) of  $1'\supset(6a)_2$ : crystal structure of  $1'\supset(6a)_2$  without  $\text{NO}_3^-$  ions and oxygen atoms.
